# Supplementary material for: Global quantitative proteomics reveal up-regulation of endoplasmic reticulum stress response proteins upon depletion of eIF5A in HeLa cells
Source: PubMed Central journal article supplement (PMC4867578; doi:10.1038/srep25795), 2016-05-16
Supplement: srep25795-s1.pdf [file srep25795-s1.pdf]

**Title: Global quantitative proteomic analyses reveal up-regulation of endoplasmic reticulum stress response proteins upon depletion of eIF5A in HeLa cells**

**Authors: Ajeet Mandal<sup>†</sup>, Swati Mandal<sup>†</sup> and Myung Hee Park<sup>\*</sup>**

**Supplementary Table S1.** Alphabetical listing of 972 unique proteins commonly identified from three independent iTRAQ experiments. The ratios of each protein in Ad-eIF5A-shRNA-transduced cells vs Ad-scramble-shRNA-transduced cells are shown at 72, 96 and 120h of transduction. The geometric mean of ratios from the three iTRAQ data sets is given at each time point and those ratios with p-value  $\leq 0.05$  are indicated by an asterisk (\*) superscript. The computed number of polyproline motifs (PPP) is given for each protein.

| #  | Accession    | Gene symbol | Gene/Protein description                                                        | Protein ratio (72h) | Protein ratio (96h) | Protein ratio (120h) | # of PPP-units |
|----|--------------|-------------|---------------------------------------------------------------------------------|---------------------|---------------------|----------------------|----------------|
| 1  | gi 109148542 | AARS        | alanine--tRNA ligase, cytoplasmic                                               | 1.15                | 0.93*               | 0.2*                 | 0              |
| 2  | gi 38569417  | AARS2       | alanine--tRNA ligase, mitochondrial                                             | 0.93                | 1.11                | 0.29*                | 0              |
| 3  | gi 69354671  | ABCF1       | ATP-binding cassette sub-family F member 1 isoform a                            | 1.59                | 0.80                | 0.52                 | 1              |
| 4  | gi 8923001   | ABHD10      | mycophenolic acid acyl-glucuronide esterase, mitochondrial isoform 1 precursor  | 2.12                | 1.51                | 0.86                 | 0              |
| 5  | gi 167614485 | ACAA2       | 3-ketoacyl-CoA thiolase, mitochondrial                                          | 1.21                | 1.24*               | 0.29*                | 0              |
| 6  | gi 4557231   | ACADM       | medium-chain specific acyl-CoA dehydrogenase, mitochondrial isoform a precursor | 0.97                | 0.71                | 0.19*                | 0              |
| 7  | gi 4557237   | ACAT1       | acetyl-CoA acetyltransferase, mitochondrial precursor                           | 1.11                | 1.06*               | 0.65                 | 0              |
| 8  | gi 148539872 | ACAT2       | acetyl-CoA acetyltransferase, cytosolic isoform 1                               | 0.92                | 0.78                | 0.59                 | 0              |
| 9  | gi 38569421  | ACLY        | ATP-citrate synthase isoform 1                                                  | 0.97*               | 0.71                | 0.5*                 | 2              |
| 10 | gi 8659555   | ACO1        | cytoplasmic aconitate hydratase                                                 | 1.17                | 1.80                | 0.92                 | 0              |
| 11 | gi 4501867   | ACO2        | aconitate hydratase, mitochondrial precursor                                    | 1.14                | 1.48                | 0.67                 | 0              |
| 12 | gi 8923812   | ACOT13      | acyl-coenzyme A thioesterase 13 isoform 1                                       | 0.72                | 1.05*               | 0.73*                | 0              |

|    |              |        |                                                                       |       |       |       |   |
|----|--------------|--------|-----------------------------------------------------------------------|-------|-------|-------|---|
| 13 | gi 42794752  | ACSL3  | long-chain-fatty-acid--CoA ligase 3                                   | 1.08  | 0.60  | 1.15  | 0 |
| 14 | gi 4501887   | ACTG1  | actin, cytoplasmic 2                                                  | 1.37  | 0.73  | 0.5*  | 0 |
| 15 | gi 4757718   | ACTL6A | actin-like protein 6A isoform 1                                       | 1.20  | 0.83  | 1.39  | 0 |
| 16 | gi 4501891   | ACTN1  | alpha-actinin-1 isoform b                                             | 1.09* | 1.32* | 0.66  | 0 |
| 17 | gi 12025678  | ACTN4  | alpha-actinin-4                                                       | 0.99  | 1.32  | 0.37* | 0 |
| 18 | gi 5031569   | ACTR1A | alpha-centractin                                                      | 0.55  | 0.80  | 0.99  | 0 |
| 19 | gi 11342680  | ACTR1B | beta-centractin                                                       | 0.71  | 0.73  | 1.18  | 0 |
| 20 | gi 5031573   | ACTR3  | actin-related protein 3 isoform 1                                     | 0.85  | 1.19  | 0.66  | 0 |
| 21 | gi 4501901   | ACY1   | aminoacylase-1 isoform a                                              | 1.41  | 1.68  | 0.79  | 0 |
| 22 | gi 71565154  | ADH5   | alcohol dehydrogenase class-3                                         | 0.78  | 0.99  | 0.59  | 0 |
| 23 | gi 32484975  | ADK    | adenosine kinase isoform b                                            | 0.59  | 0.55  | 0.36* | 0 |
| 24 | gi 34577063  | ADSS   | adenylosuccinate synthetase isozyme 2                                 | 1.04  | 1.18  | 0.84  | 0 |
| 25 | gi 116734847 | AGL    | glycogen debranching enzyme isoform 1                                 | 0.90  | 0.76  | 0.54* | 0 |
| 26 | gi 4501993   | AGPS   | alkyldihydroxyacetonephosphate synthase, peroxisomal precursor        | 1.23  | 0.58  | 0.42* | 0 |
| 27 | gi 262359929 | AHCTF1 | protein ELYS                                                          | 0.77  | 0.91  | 1.01  | 2 |
| 28 | gi 9951915   | AHCY   | adenosylhomocysteinase isoform 1                                      | 0.77  | 1.17  | 0.54* | 0 |
| 29 | gi 61743954  | AHNAK  | neuroblast differentiation-associated protein AHNAK isoform 1         | 0.93  | 0.98* | 0.32* | 0 |
| 30 | gi 156766050 | AHNAK2 | protein AHNAK2                                                        | 0.84  | 0.83  | 0.84  | 0 |
| 31 | gi 4757732   | AIFM1  | apoptosis-inducing factor 1, mitochondrial isoform AIF precursor      | 0.82  | 1.22  | 0.57  | 0 |
| 32 | gi 11125770  | AIMP2  | aminoacyl tRNA synthase complex-interacting multifunctional protein 2 | 1.00  | 0.69  | 0.88  | 0 |

|    |              |          |                                                               |       |       |       |   |
|----|--------------|----------|---------------------------------------------------------------|-------|-------|-------|---|
| 33 | gi 4502011   | AK1      | adenylate kinase isoenzyme 1                                  | 1.27  | 0.83  | 0.33* | 0 |
| 34 | gi 8051579   | AK4      | adenylate kinase 4, mitochondrial                             | 1.23  | 1.06  | 0.75  | 0 |
| 35 | gi 4502049   | AKR1B1   | aldose reductase                                              | 1.17  | 0.86  | 0.43  | 0 |
| 36 | gi 62912457  | ALDH18A1 | delta-1-pyrroline-5-carboxylate synthase isoform 2            | 1.03  | 0.75  | 0.77  | 0 |
| 37 | gi 115387104 | ALDH9A1  | 4-trimethylaminobutyraldehyde dehydrogenase                   | 0.70  | 1.06  | 0.99  | 0 |
| 38 | gi 4885063   | ALDOC    | fructose-bisphosphate aldolase C                              | 1.62  | 1.44  | 0.47  | 0 |
| 39 | gi 238776833 | ALYREF   | THO complex subunit 4                                         | 1.11  | 1.47  | 0.60  | 0 |
| 40 | gi 5453880   | ANP32A   | acidic leucine-rich nuclear phosphoprotein 32 family member A | 0.48  | 0.80  | 0.55  | 0 |
| 41 | gi 5454088   | ANP32B   | acidic leucine-rich nuclear phosphoprotein 32 family member B | 0.71* | 0.71* | 0.4*  | 0 |
| 42 | gi 4502101   | ANXA1    | annexin A1                                                    | 0.53  | 1.14  | 1*    | 0 |
| 43 | gi 4557317   | ANXA11   | annexin A11 isoform 1                                         | 0.84  | 0.74  | 2.13* | 4 |
| 44 | gi 4826643   | ANXA3    | annexin A3                                                    | 1.23  | 0.39  | 1.21  | 0 |
| 45 | gi 4502105   | ANXA4    | annexin A4                                                    | 0.63  | 0.70  | 1.48  | 0 |
| 46 | gi 4502107   | ANXA5    | annexin A5                                                    | 1.27  | 0.83  | 1.65* | 0 |
| 47 | gi 71773329  | ANXA6    | annexin A6 isoform 1                                          | 0.76* | 0.66  | 1.8*  | 0 |
| 48 | gi 4809279   | ANXA7    | annexin A7 isoform 2                                          | 0.92* | 0.84  | 1.69* | 0 |
| 49 | gi 71773106  | AP2B1    | AP-2 complex subunit beta isoform a                           | 0.50  | 0.81  | 1.07  | 0 |
| 50 | gi 68799814  | AP2M1    | AP-2 complex subunit mu isoform b                             | 1.39  | 0.88  | 0.84  | 0 |
| 51 | gi 23510451  | APEH     | acylamino-acid-releasing enzyme                               | 0.75  | 0.70  | 0.29  | 1 |
| 52 | gi 18375501  | APEX1    | DNA-(apurinic or apyrimidinic site) lyase                     | 0.37  | 0.76  | 0.67  | 0 |

|    |              |          |                                                                       |       |       |       |   |
|----|--------------|----------|-----------------------------------------------------------------------|-------|-------|-------|---|
| 53 | gi 24308201  | APMAP    | adipocyte plasma membrane-associated protein                          | 1.14  | 1.33  | 2.14  | 0 |
| 54 | gi 91984773  | APOA1BP  | NAD(P)H-hydrate epimerase precursor                                   | 1.40  | 0.88  | 0.67  | 0 |
| 55 | gi 4502171   | APRT     | adenine phosphoribosyltransferase isoform a                           | 0.78  | 0.63  | 0.3*  | 0 |
| 56 | gi 11863154  | ARCN1    | coatomer subunit delta isoform 1                                      | 1.18  | 1.18  | 1.27  | 0 |
| 57 | gi 4757768   | ARHGDI A | rho GDP-dissociation inhibitor 1 isoform a                            | 1.01  | 1.21  | 0.77  | 0 |
| 58 | gi 253735778 | ARHGEF2  | rho guanine nucleotide exchange factor 2 isoform 2                    | 0.73  | 1.24  | 1.38  | 0 |
| 59 | gi 5031595   | ARPC4    | actin-related protein 2/3 complex subunit 4 isoform a                 | 1.03  | 0.51  | 0.89  | 0 |
| 60 | gi 50428938  | ASNA1    | ATPase ASNA1                                                          | 0.66  | 0.91  | 0.74  | 0 |
| 61 | gi 16950633  | ASS1     | argininosuccinate synthase                                            | 1.29  | 0.57  | 0.3*  | 0 |
| 62 | gi 283436222 | ATAD3A   | ATPase family AAA domain-containing protein 3A isoform 2              | 0.69  | 0.77  | 1.08  | 1 |
| 63 | gi 19526773  | ATG3     | ubiquitin-like-conjugating enzyme ATG3 isoform 1                      | 0.94  | 1.18  | 0.63  | 1 |
| 64 | gi 20127454  | ATIC     | bifunctional purine biosynthesis protein PURH                         | 0.82  | 1.10  | 0.38* | 0 |
| 65 | gi 45827806  | ATL3     | atlastin-3 isoform 1                                                  | 1.29  | 1.17  | 1.19  | 0 |
| 66 | gi 48255959  | ATP2B4   | plasma membrane calcium-transporting ATPase 4 isoform 4a              | 1.06  | 0.90  | 1.22  | 0 |
| 67 | gi 4757810   | ATP5A1   | ATP synthase subunit alpha, mitochondrial isoform a precursor         | 0.88* | 1.84* | 2.12* | 0 |
| 68 | gi 32189394  | ATP5B    | ATP synthase subunit beta, mitochondrial precursor                    | 0.81* | 1.22  | 2.15* | 0 |
| 69 | gi 50345988  | ATP5C1   | ATP synthase subunit gamma, mitochondrial isoform L (liver) precursor | 0.74  | 0.69  | 1.02  | 0 |
| 70 | gi 5453559   | ATP5H    | ATP synthase subunit d, mitochondrial isoform a                       | 0.62  | 1.73  | 3.53* | 0 |
| 71 | gi 51479156  | ATP5L    | ATP synthase subunit g, mitochondrial                                 | 0.53  | 0.88  | 2.16  | 0 |
| 72 | gi 4502303   | ATP5O    | ATP synthase subunit O, mitochondrial precursor                       | 0.88  | 1.57* | 2.24* | 0 |

|    |              |          |                                                                                |       |       |       |   |
|----|--------------|----------|--------------------------------------------------------------------------------|-------|-------|-------|---|
| 73 | gi 19913424  | ATP6V1A  | V-type proton ATPase catalytic subunit A                                       | 0.80  | 1.15  | 0.89  | 0 |
| 74 | gi 19913428  | ATP6V1B2 | V-type proton ATPase subunit B, brain isoform                                  | 2.23  | 0.51  | 1.23  | 0 |
| 75 | gi 7106299   | ATXN10   | ataxin-10 isoform 1                                                            | 0.56  | 1.46  | 1.01  | 1 |
| 76 | gi 14043024  | BAG3     | BAG family molecular chaperone regulator 3                                     | 0.83  | 1.99* | 0.69  | 2 |
| 77 | gi 30795231  | BASP1    | brain acid soluble protein 1                                                   | 3.45* | 2.53* | 0.89* | 0 |
| 78 | gi 61742797  | BCAM     | basal cell adhesion molecule isoform 2 precursor                               | 1.03  | 1.04  | 1.01  | 0 |
| 79 | gi 4557367   | BLMH     | bleomycin hydrolase                                                            | 1.72  | 0.97  | 0.46  | 0 |
| 80 | gi 4502419   | BLVRB    | flavin reductase (NADPH)                                                       | 0.88  | 0.43  | 0.47  | 0 |
| 81 | gi 7705638   | BOLA1    | bolA-like protein 1 precursor                                                  | 1.32  | 1.81  | 0.67  | 0 |
| 82 | gi 21327667  | BOP1     | ribosome biogenesis protein BOP1                                               | 0.93  | 0.77  | 0.76  | 1 |
| 83 | gi 116812595 | BPNT1    | 3'(2'),5'-bisphosphate nucleotidase 1 isoform 1                                | 0.99  | 1.10  | 0.85  | 0 |
| 84 | gi 38372925  | BSG      | basigin isoform 2                                                              | 1.41  | 1.32  | 1.60  | 0 |
| 85 | gi 83641885  | BTF3     | transcription factor BTF3 isoform A                                            | 0.68  | 1.05  | 0.48  | 1 |
| 86 | gi 333470721 | BZW1     | basic leucine zipper and W2 domain-containing protein 1 isoform 3              | 0.99  | 0.53  | 0.45* | 0 |
| 87 | gi 7661744   | BZW2     | basic leucine zipper and W2 domain-containing protein 2                        | 1.20  | 0.77  | 0.37  | 0 |
| 88 | gi 145275185 | C12orf10 | UPF0160 protein MYG1, mitochondrial precursor                                  | 1.07* | 1.05  | 0.3*  | 2 |
| 89 | gi 19923951  | C12orf57 | protein C10 isoform 1                                                          | 1.22  | 1.37  | 0.52  | 0 |
| 90 | gi 33457348  | C19orf10 | UPF0556 protein C19orf10 precursor                                             | 0.77  | 1.41  | 2.18  | 0 |
| 91 | gi 4502491   | C1QBP    | complement component 1 Q subcomponent-binding protein, mitochondrial precursor | 0.77  | 1.10  | 2.13* | 0 |
| 92 | gi 296531406 | C21orf33 | ES1 protein homolog, mitochondrial isoform Ia precursor                        | 0.82  | 1.02  | 0.93  | 0 |

|     |              |         |                                                    |       |       |       |   |
|-----|--------------|---------|----------------------------------------------------|-------|-------|-------|---|
| 93  | gi 7656952   | CACYBP  | calcyclin-binding protein isoform 1                | 0.64  | 0.90  | 0.46  | 0 |
| 94  | gi 18105007  | CAD     | CAD protein isoform 1                              | 0.79  | 0.57  | 0.42* | 3 |
| 95  | gi 4502549   | CALM1   | calmodulin isoform 2                               | 1.65  | 0.95  | 0.82  | 0 |
| 96  | gi 4757900   | CALR    | calreticulin precursor                             | 0.65  | 1.64* | 4.09* | 0 |
| 97  | gi 21361794  | CAND1   | cullin-associated NEDD8-dissociated protein 1      | 0.44  | 0.71  | 1.12  | 0 |
| 98  | gi 10716563  | CANX    | calnexin precursor                                 | 1.49  | 1.35  | 2.63* | 0 |
| 99  | gi 5453595   | CAP1    | adenylyl cyclase-associated protein 1              | 1.24* | 1.02  | 0.65* | 3 |
| 100 | gi 63252913  | CAPG    | macrophage-capping protein isoform 1               | 1.44  | 0.77  | 0.31* | 0 |
| 101 | gi 157389005 | CAPN2   | calpain-2 catalytic subunit isoform 1              | 0.72  | 0.76  | 0.73  | 1 |
| 102 | gi 4502565   | CAPNS1  | calpain small subunit 1 isoform 1                  | 0.23  | 1.71  | 2.15  | 1 |
| 103 | gi 42558250  | CAPRIN1 | caprin-1 isoform 1                                 | 1.25  | 0.90  | 0.66  | 1 |
| 104 | gi 5453597   | CAPZA1  | F-actin-capping protein subunit alpha-1            | 0.95  | 1.08  | 0.90  | 0 |
| 105 | gi 62240992  | CARS    | cysteine--tRNA ligase, cytoplasmic isoform c       | 0.88  | 0.64  | 0.98  | 0 |
| 106 | gi 109637759 | CAST    | calpastatin isoform f                              | 1.27  | 0.85  | 0.66  | 0 |
| 107 | gi 4557014   | CAT     | catalase                                           | 1.54  | 1.16  | 1.86* | 0 |
| 108 | gi 4557415   | CBS     | cystathionine beta-synthase                        | 0.64  | 0.80  | 0.25* | 0 |
| 109 | gi 15082258  | CBX3    | chromobox protein homolog 3                        | 1.15  | 0.90  | 0.52  | 0 |
| 110 | gi 6912292   | CBX5    | chromobox protein homolog 5                        | 0.50  | 1.29  | 0.34  | 0 |
| 111 | gi 24432106  | CCAR2   | cell cycle and apoptosis regulator protein 2       | 1.29  | 0.60  | 0.50  | 3 |
| 112 | gi 171906582 | CCDC47  | coiled-coil domain-containing protein 47 precursor | 0.62  | 1.14  | 2.75* | 0 |

|     |              |          |                                                              |       |       |       |   |
|-----|--------------|----------|--------------------------------------------------------------|-------|-------|-------|---|
| 113 | gi 46852390  | CCDC6    | coiled-coil domain-containing protein 6                      | 0.71  | 0.94  | 0.39  | 4 |
| 114 | gi 5453603   | CCT2     | T-complex protein 1 subunit beta isoform 1                   | 0.90  | 0.68* | 1.11  | 0 |
| 115 | gi 63162572  | CCT3     | T-complex protein 1 subunit gamma isoform a                  | 1.06  | 0.57  | 1.40  | 0 |
| 116 | gi 38455427  | CCT4     | T-complex protein 1 subunit delta isoform a                  | 0.99* | 0.92  | 1.54* | 0 |
| 117 | gi 24307939  | CCT5     | T-complex protein 1 subunit epsilon isoform a                | 1.29* | 0.8*  | 1.25  | 0 |
| 118 | gi 4502643   | CCT6A    | T-complex protein 1 subunit zeta isoform a                   | 1.05  | 0.61  | 1.32  | 0 |
| 119 | gi 5453607   | CCT7     | T-complex protein 1 subunit eta isoform a                    | 1.05  | 0.62* | 1.72* | 0 |
| 120 | gi 48762932  | CCT8     | T-complex protein 1 subunit theta isoform 1                  | 0.87  | 1.22  | 1.92* | 0 |
| 121 | gi 227430301 | CD109    | CD109 antigen isoform 2 preproprotein                        | 1.03  | 0.89  | 2.05  | 0 |
| 122 | gi 11321634  | CD2AP    | CD2-associated protein                                       | 0.85  | 1.41  | 1.09  | 2 |
| 123 | gi 168693643 | CD55     | complement decay-accelerating factor isoform 2 precursor     | 1.78  | 1.11  | 0.9*  | 1 |
| 124 | gi 11386157  | CDA      | cytidine deaminase                                           | 0.92  | 1.49  | 0.70  | 0 |
| 125 | gi 5901922   | CDC37    | hsp90 co-chaperone Cdc37                                     | 1.39  | 0.83  | 0.34* | 0 |
| 126 | gi 4757952   | CDC42    | cell division control protein 42 homolog isoform 1 precursor | 2.16  | 0.76  | 0.47  | 0 |
| 127 | gi 13786127  | CDC42EP4 | cdc42 effector protein 4                                     | 0.95  | 0.75  | 1.02  | 0 |
| 128 | gi 11067747  | CDC5L    | cell division cycle 5-like protein                           | 1.12  | 0.84  | 0.58  | 0 |
| 129 | gi 4502709   | CDK1     | cyclin-dependent kinase 1 isoform 1                          | 1.09  | 1.01  | 0.55  | 0 |
| 130 | gi 4502749   | CDKN2A   | cyclin-dependent kinase inhibitor 2A isoform p16INK4a        | 0.95  | 0.29* | 0.36  | 0 |
| 131 | gi 8923710   | CDV3     | protein CDV3 homolog isoform b                               | 0.93  | 0.83  | 0.12* | 0 |
| 132 | gi 42542392  | CEBPZ    | CCAAT/enhancer-binding protein zeta                          | 0.96  | 1.08  | 3.18  | 0 |

|     |              |          |                                                                           |       |       |       |   |
|-----|--------------|----------|---------------------------------------------------------------------------|-------|-------|-------|---|
| 133 | gi 5031635   | CFL1     | cofilin-1                                                                 | 1.38  | 2.1*  | 0.16* | 0 |
| 134 | gi 7705851   | CHCHD2   | coiled-coil-helix-coiled-coil-helix domain-containing protein 2 precursor | 0.90  | 0.63  | 0.19  | 0 |
| 135 | gi 221316566 | CHORDC1  | cysteine and histidine-rich domain-containing protein 1 isoform a         | 0.81  | 0.67  | 0.27  | 0 |
| 136 | gi 19920317  | CKAP4    | cytoskeleton-associated protein 4                                         | 1.67  | 2.82* | 4.76* | 2 |
| 137 | gi 21536286  | CKB      | creatine kinase B-type                                                    | 1.44  | 0.82  | 0.19* | 0 |
| 138 | gi 10334859  | CKMT1A   | creatine kinase U-type, mitochondrial precursor                           | 0.94  | 0.98  | 0.35* | 0 |
| 139 | gi 14251209  | CLIC1    | chloride intracellular channel protein 1                                  | 0.60  | 0.73  | 0.90  | 0 |
| 140 | gi 4502891   | CLNS1A   | methylosome subunit pICln isoform a                                       | 0.88  | 1.00  | 0.66  | 1 |
| 141 | gi 5174419   | CLPP     | ATP-dependent Clp protease proteolytic subunit, mitochondrial precursor   | 1.06  | 2.08  | 1.02  | 0 |
| 142 | gi 6005993   | CLTA     | clathrin light chain A isoform b                                          | 1.24  | 1.32  | 2.12* | 0 |
| 143 | gi 4758012   | CLTC     | clathrin heavy chain 1 isoform 1                                          | 0.65* | 0.88  | 2.92* | 0 |
| 144 | gi 355594753 | CLU      | clusterin preproprotein                                                   | 0.95  | 1.11  | 1.36  | 0 |
| 145 | gi 20270371  | CMBL     | carboxymethylenebutenolidase homolog                                      | 1.10  | 1.23  | 0.49  | 0 |
| 146 | gi 7706497   | CMPK1    | UMP-CMP kinase isoform a                                                  | 1.23  | 0.94  | 0.32  | 0 |
| 147 | gi 271398239 | CNDP2    | cytosolic non-specific dipeptidase isoform 1                              | 1.12  | 1.06  | 0.75* | 0 |
| 148 | gi 7657176   | CNPY2    | protein canopy homolog 2 isoform 1 precursor                              | 0.82  | 1.80  | 1.99  | 0 |
| 149 | gi 31377697  | COLGALT1 | procollagen galactosyltransferase 1 precursor                             | 0.94  | 3.25* | 4.31* | 0 |
| 150 | gi 7705369   | COPB1    | coatamer subunit beta                                                     | 1.09  | 1.02  | 1.46  | 0 |
| 151 | gi 4758032   | COPB2    | coatamer subunit beta'                                                    | 0.62  | 0.61  | 0.75  | 0 |
| 152 | gi 31542319  | COPE     | coatamer subunit epsilon isoform a                                        | 0.99* | 1.44  | 1.55  | 0 |

|     |              |        |                                                                          |       |       |       |    |
|-----|--------------|--------|--------------------------------------------------------------------------|-------|-------|-------|----|
| 153 | gi 11559929  | COPG1  | coatomer subunit gamma-1                                                 | 0.94  | 0.72  | 1.01  | 0  |
| 154 | gi 109134349 | COPG2  | coatomer subunit gamma-2 isoform 1                                       | 0.53  | 0.47  | 0.87  | 0  |
| 155 | gi 38373690  | COPS4  | COP9 signalosome complex subunit 4 isoform 1                             | 1.10  | 0.88  | 1.06  | 0  |
| 156 | gi 5729779   | COPS8  | COP9 signalosome complex subunit 8 isoform 1                             | 1.17  | 0.68  | 0.69  | 0  |
| 157 | gi 7706337   | COPZ1  | coatomer subunit zeta-1 isoform 1                                        | 0.62  | 0.72  | 2.62  | 0  |
| 158 | gi 21624607  | COTL1  | coactosin-like protein                                                   | 0.91  | 0.83  | 0.40  | 0  |
| 159 | gi 4502981   | COX4I1 | cytochrome c oxidase subunit 4 isoform 1, mitochondrial precursor        | 1.24  | 1.45  | 1.54  | 0  |
| 160 | gi 190885499 | COX5A  | cytochrome c oxidase subunit 5A, mitochondrial precursor                 | 0.42  | 1.35* | 2.63* | 0  |
| 161 | gi 4502985   | COX6B1 | cytochrome c oxidase subunit 6B1                                         | 0.92* | 0.87  | 0.74  | 0  |
| 162 | gi 4503015   | CPNE3  | copine-3                                                                 | 1.03  | 1.08  | 0.86  | 0  |
| 163 | gi 41393599  | CPOX   | oxygen-dependent coproporphyrinogen-III oxidase, mitochondrial precursor | 0.68  | 0.79  | 0.70  | 0  |
| 164 | gi 34101288  | CPSF2  | cleavage and polyadenylation specificity factor subunit 2                | 1.10  | 0.78  | 1.10  | 0  |
| 165 | gi 162329583 | CPSF6  | cleavage and polyadenylation specificity factor subunit 6 isoform 1      | 1.04  | 1.21  | 0.61  | 14 |
| 166 | gi 41327712  | CRK    | adapter molecule crk isoform a                                           | 1.39  | 0.77  | 0.37  | 1  |
| 167 | gi 4885153   | CRKL   | crk-like protein                                                         | 1.57  | 1.85  | 0.25* | 0  |
| 168 | gi 38327625  | CS     | citrate synthase, mitochondrial precursor                                | 1.86* | 1.18  | 2.1*  | 0  |
| 169 | gi 4758086   | CSRP1  | cysteine and glycine-rich protein 1 isoform 1                            | 1.15  | 0.86  | 0.47  | 0  |
| 170 | gi 4503117   | CSTB   | cystatin-B                                                               | 0.92  | 1.04  | 0.14* | 0  |
| 171 | gi 4557493   | CSTF2  | cleavage stimulation factor subunit 2 isoform 2                          | 0.74  | 1.15  | 0.49  | 1  |
| 172 | gi 55770844  | CTNNA1 | catenin alpha-1 isoform 1                                                | 0.98  | 0.86  | 0.64  | 0  |

|     |              |        |                                                                              |       |       |       |   |
|-----|--------------|--------|------------------------------------------------------------------------------|-------|-------|-------|---|
| 173 | gi 4503139   | CTSB   | cathepsin B preproprotein                                                    | 0.88  | 2.11  | 1.97* | 0 |
| 174 | gi 189083844 | CTSC   | dipeptidyl peptidase 1 isoform a preproprotein                               | 0.82  | 1.04  | 0.47  | 0 |
| 175 | gi 4503143   | CTSD   | cathepsin D preproprotein                                                    | 1.03  | 0.70  | 2.28* | 1 |
| 176 | gi 22538442  | CTSZ   | cathepsin Z preproprotein                                                    | 1.04  | 0.99  | 0.63  | 0 |
| 177 | gi 20357552  | CTTN   | src substrate cortactin isoform a                                            | 0.90  | 0.91  | 0.32* | 0 |
| 178 | gi 121114302 | CUL4B  | cullin-4B isoform 2                                                          | 0.66  | 0.70  | 1.59  | 0 |
| 179 | gi 21359867  | CYC1   | cytochrome c1, heme protein, mitochondrial precursor                         | 0.91  | 0.87  | 1.02  | 0 |
| 180 | gi 11128019  | CYCS   | cytochrome c                                                                 | 0.77  | 1.02  | 0.67  | 0 |
| 181 | gi 294997282 | DAG1   | dystroglycan preproprotein                                                   | 1.59  | 1.21  | 1.48  | 4 |
| 182 | gi 20149621  | DAK    | bifunctional ATP-dependent dihydroxyacetone kinase/FAD-AMP lyase (cyclizing) | 2.16  | 3.52  | 0.33* | 1 |
| 183 | gi 45439306  | DARS   | aspartate--tRNA ligase, cytoplasmic isoform 1                                | 1.34  | 0.81  | 0.81  | 0 |
| 184 | gi 25470890  | DAZAP1 | DAZ-associated protein 1 isoform a                                           | 1.00  | 0.99  | 0.46  | 9 |
| 185 | gi 56549113  | DBR1   | lariat debranching enzyme                                                    | 0.91  | 0.96  | 1.47  | 0 |
| 186 | gi 5453629   | DCTN2  | dynactin subunit 2 isoform 1                                                 | 0.7*  | 0.80  | 0.76  | 0 |
| 187 | gi 6912328   | DDAH1  | N(G),N(G)-dimethylarginine dimethylaminohydrolase 1 isoform 1                | 1.87  | 0.92  | 0.59  | 0 |
| 188 | gi 148529014 | DDB1   | DNA damage-binding protein 1                                                 | 0.53* | 0.89  | 0.84  | 0 |
| 189 | gi 62955833  | DDI2   | protein DDI1 homolog 2                                                       | 0.36* | 1.39  | 0.63  | 0 |
| 190 | gi 4503291   | DDT    | D-dopachrome decarboxylase                                                   | 0.62  | 0.97  | 0.55  | 0 |
| 191 | gi 4826686   | DDX1   | ATP-dependent RNA helicase DDX1                                              | 0.77  | 0.56  | 0.31* | 0 |
| 192 | gi 50659095  | DDX21  | nucleolar RNA helicase 2 isoform 1                                           | 0.78* | 0.48* | 0.54* | 0 |

|     |              |         |                                                                                                                                      |       |       |       |   |
|-----|--------------|---------|--------------------------------------------------------------------------------------------------------------------------------------|-------|-------|-------|---|
| 193 | gi 21040371  | DDX39A  | ATP-dependent RNA helicase DDX39A                                                                                                    | 0.73  | 0.76  | 0.65  | 0 |
| 194 | gi 4758112   | DDX39B  | spliceosome RNA helicase DDX39B                                                                                                      | 1.49  | 0.72  | 0.31* | 0 |
| 195 | gi 41327773  | DDX46   | probable ATP-dependent RNA helicase DDX46 isoform 2                                                                                  | 0.92  | 0.98  | 0.65  | 0 |
| 196 | gi 4758138   | DDX5    | probable ATP-dependent RNA helicase DDX5                                                                                             | 0.79  | 1.18  | 1.21  | 0 |
| 197 | gi 4503301   | DECR1   | 2,4-dienoyl-CoA reductase, mitochondrial precursor                                                                                   | 1.25  | 1.08  | 1.64* | 0 |
| 198 | gi 4503249   | DEK     | protein DEK isoform 1                                                                                                                | 0.78  | 0.81  | 0.52  | 0 |
| 199 | gi 27501446  | DENR    | density-regulated protein                                                                                                            | 0.72  | 0.88* | 0.30  | 0 |
| 200 | gi 4758148   | DFFA    | DNA fragmentation factor subunit alpha isoform 1                                                                                     | 0.80  | 0.97  | 0.58  | 0 |
| 201 | gi 68509926  | DHX15   | pre-mRNA-splicing factor ATP-dependent RNA helicase DHX15                                                                            | 1.02  | 1.45  | 0.71  | 1 |
| 202 | gi 100913206 | DHX9    | ATP-dependent RNA helicase A                                                                                                         | 0.81* | 0.80  | 2.29* | 4 |
| 203 | gi 9845297   | DIABLO  | diablo homolog, mitochondrial isoform 1 precursor                                                                                    | 1.08  | 1.03  | 0.80  | 0 |
| 204 | gi 55749758  | DIP2B   | disco-interacting protein 2 homolog B                                                                                                | 1.00  | 2.02  | 1.21  | 0 |
| 205 | gi 31711992  | DLAT    | dihydrolipoyllysine-residue acetyltransferase component of pyruvate dehydrogenase complex, mitochondrial precursor                   | 1.26  | 2.00  | 1.30  | 2 |
| 206 | gi 91199540  | DLD     | dihydrolipoyl dehydrogenase, mitochondrial isoform 1 precursor                                                                       | 1.02  | 1.44* | 2.42* | 0 |
| 207 | gi 19923748  | DLST    | dihydrolipoyllysine-residue succinyltransferase component of 2-oxoglutarate dehydrogenase complex, mitochondrial isoform 1 precursor | 0.81  | 0.94  | 1.53  | 1 |
| 208 | gi 4504511   | DNAJA1  | dnaJ homolog subfamily A member 1                                                                                                    | 1.01  | 0.79  | 1.49  | 0 |
| 209 | gi 5031741   | DNAJA2  | dnaJ homolog subfamily A member 2                                                                                                    | 1.06  | 0.98  | 1.19  | 0 |
| 210 | gi 5453690   | DNAJB1  | dnaJ homolog subfamily B member 1 isoform 1                                                                                          | 1.98  | 0.94  | 2.15  | 0 |
| 211 | gi 7706495   | DNAJB11 | dnaJ homolog subfamily B member 11 precursor                                                                                         | 0.85  | 1.19  | 1.80  | 0 |
| 212 | gi 6631085   | DNAJB4  | dnaJ homolog subfamily B member 4                                                                                                    | 1.42  | 0.69  | 0.38  | 0 |

|     |              |          |                                                                      |       |       |       |   |
|-----|--------------|----------|----------------------------------------------------------------------|-------|-------|-------|---|
| 213 | gi 262206280 | DNAJC7   | dnaJ homolog subfamily C member 7 isoform 1                          | 0.87  | 1.04  | 0.46  | 0 |
| 214 | gi 112293277 | DNAJC8   | dnaJ homolog subfamily C member 8                                    | 0.56  | 0.79  | 0.72  | 0 |
| 215 | gi 27597059  | DNAJC9   | dnaJ homolog subfamily C member 9                                    | 0.85  | 0.79  | 0.77  | 0 |
| 216 | gi 4503349   | DNASE2   | deoxyribonuclease-2-alpha precursor                                  | 0.97  | 1.07  | 1.31  | 1 |
| 217 | gi 171460916 | DNM1L    | dynammin-1-like protein isoform 2                                    | 0.78  | 0.90  | 0.69  | 0 |
| 218 | gi 5454002   | DNPH1    | 2'-deoxynucleoside 5'-phosphate N-hydrolase 1 isoform 1              | 0.88  | 0.96  | 0.52  | 0 |
| 219 | gi 54633315  | DNTTIP2  | deoxynucleotidyltransferase terminal-interacting protein 2           | 1.19  | 0.64  | 0.44  | 0 |
| 220 | gi 117190262 | DPH5     | diphthine methyl ester synthase isoform a                            | 1.74  | 1.05  | 1.27  | 0 |
| 221 | gi 116534898 | DSG2     | desmoglein-2 preproprotein                                           | 1.23  | 1.25  | 1.06  | 0 |
| 222 | gi 58530840  | DSP      | desmoplakin isoform I                                                | 0.97* | 1.07  | 0.33* | 1 |
| 223 | gi 33350932  | DYNC1H1  | cytoplasmic dynein 1 heavy chain 1                                   | 0.68  | 0.76  | 1.37* | 1 |
| 224 | gi 422398894 | DYNC1I2  | cytoplasmic dynein 1 intermediate chain 2 isoform 4                  | 0.80  | 0.89  | 0.96  | 1 |
| 225 | gi 166795297 | DYNC1LI1 | cytoplasmic dynein 1 light intermediate chain 1                      | 0.76  | 0.55  | 1.22  | 0 |
| 226 | gi 70995211  | ECH1     | delta(3,5)-Delta(2,4)-dienoyl-CoA isomerase, mitochondrial precursor | 1.76  | 1.68  | 2.02* | 0 |
| 227 | gi 194097323 | ECHS1    | enoyl-CoA hydratase, mitochondrial                                   | 0.96  | 0.91  | 1.97* | 0 |
| 228 | gi 62530384  | ECI1     | enoyl-CoA delta isomerase 1, mitochondrial isoform 1 precursor       | 0.88  | 0.74  | 1.05  | 0 |
| 229 | gi 45827771  | EDC4     | enhancer of mRNA-decapping protein 4                                 | 1.11  | 0.75  | 0.31  | 0 |
| 230 | gi 4503453   | EDF1     | endothelial differentiation-related factor 1 isoform alpha           | 1.54  | 0.76  | 0.21* | 0 |
| 231 | gi 55770888  | EEA1     | early endosome antigen 1                                             | 0.66  | 0.87  | 1.87* | 0 |
| 232 | gi 4503471   | EEF1A1   | elongation factor 1-alpha 1                                          | 1.13* | 0.68* | 0.25* | 0 |

|     |              |        |                                                                |       |       |       |   |
|-----|--------------|--------|----------------------------------------------------------------|-------|-------|-------|---|
| 233 | gi 4503477   | EEF1B2 | elongation factor 1-beta                                       | 1.15  | 1.52* | 0.34  | 1 |
| 234 | gi 304555581 | EEF1D  | elongation factor 1-delta isoform 1                            | 1.51* | 1.44  | 0.54  | 0 |
| 235 | gi 4503481   | EEF1G  | elongation factor 1-gamma                                      | 1.00  | 0.66  | 0.67  | 0 |
| 236 | gi 4503483   | EEF2   | elongation factor 2                                            | 1.57* | 0.79* | 0.61* | 0 |
| 237 | gi 20149675  | EFHD2  | EF-hand domain-containing protein D2                           | 1.16  | 1.21  | 1.20  | 0 |
| 238 | gi 4503499   | EIF1AX | eukaryotic translation initiation factor 1A, X-chromosomal     | 0.88  | 1.01  | 0.47  | 0 |
| 239 | gi 54873624  | EIF2A  | eukaryotic translation initiation factor 2A                    | 1.05  | 1.07  | 0.82  | 0 |
| 240 | gi 4503509   | EIF3A  | eukaryotic translation initiation factor 3 subunit A           | 0.87  | 0.44* | 0.77* | 1 |
| 241 | gi 33239445  | EIF3B  | eukaryotic translation initiation factor 3 subunit B           | 0.91  | 0.91  | 0.94  | 1 |
| 242 | gi 4503525   | EIF3C  | eukaryotic translation initiation factor 3 subunit C isoform a | 0.85  | 1.10  | 1.39  | 0 |
| 243 | gi 4503523   | EIF3D  | eukaryotic translation initiation factor 3 subunit D           | 1.29  | 0.90  | 0.73  | 0 |
| 244 | gi 4503519   | EIF3F  | eukaryotic translation initiation factor 3 subunit F           | 0.78  | 1.05  | 1.93* | 0 |
| 245 | gi 4503515   | EIF3H  | eukaryotic translation initiation factor 3 subunit H           | 0.79  | 0.87  | 1.96* | 0 |
| 246 | gi 4503513   | EIF3I  | eukaryotic translation initiation factor 3 subunit I           | 0.57  | 1.00  | 1.21  | 0 |
| 247 | gi 83281438  | EIF3J  | eukaryotic translation initiation factor 3 subunit J isoform 1 | 1.13  | 1.06  | 0.89  | 0 |
| 248 | gi 10801345  | EIF3K  | eukaryotic translation initiation factor 3 subunit K isoform 1 | 1.56  | 0.89  | 1.15  | 0 |
| 249 | gi 7705433   | EIF3L  | eukaryotic translation initiation factor 3 subunit L isoform 1 | 1.13  | 0.63  | 0.90  | 0 |
| 250 | gi 23397429  | EIF3M  | eukaryotic translation initiation factor 3 subunit M isoform 1 | 1.52  | 0.75  | 1.66  | 0 |
| 251 | gi 4503529   | EIF4A1 | eukaryotic initiation factor 4A-I isoform 1                    | 0.93  | 0.44  | 0.37  | 0 |
| 252 | gi 7661920   | EIF4A3 | eukaryotic initiation factor 4A-III                            | 0.59  | 0.81  | 0.47  | 0 |

|     |              |         |                                                                       |       |       |       |   |
|-----|--------------|---------|-----------------------------------------------------------------------|-------|-------|-------|---|
| 253 | gi 50053795  | EIF4B   | eukaryotic translation initiation factor 4B isoform 2                 | 1.13  | 1.09  | 0.29  | 1 |
| 254 | gi 289577080 | EIF4G2  | eukaryotic translation initiation factor 4 gamma 2 isoform 1          | 0.78  | 0.44  | 0.62  | 1 |
| 255 | gi 21361337  | EIF5    | eukaryotic translation initiation factor 5                            | 0.58* | 0.42  | 0.16  | 3 |
| 256 | gi 4503545   | EIF5A   | eukaryotic translation initiation factor 5A-1 isoform B               | 0.2*  | 0.17* | 0.18* | 0 |
| 257 | gi 84043963  | EIF5B   | eukaryotic translation initiation factor 5B                           | 0.91  | 0.64  | 0.79  | 2 |
| 258 | gi 4504771   | EIF6    | eukaryotic translation initiation factor 6 isoform a                  | 0.88  | 1.05  | 0.28  | 0 |
| 259 | gi 260166622 | ELAC2   | zinc phosphodiesterase ELAC protein 2 isoform 2                       | 0.83  | 0.80  | 0.77  | 0 |
| 260 | gi 38201714  | ELAVL1  | ELAV-like protein 1                                                   | 1.24  | 0.48  | 0.59  | 0 |
| 261 | gi 194328699 | EMG1    | ribosomal RNA small subunit methyltransferase NEP1                    | 0.80  | 0.77  | 0.21  | 0 |
| 262 | gi 4503571   | ENO1    | alpha-enolase isoform 1                                               | 1.23  | 0.68  | 0.33* | 0 |
| 263 | gi 4503579   | EPB41L2 | band 4.1-like protein 2 isoform a                                     | 1.04  | 0.94  | 0.46  | 1 |
| 264 | gi 62241042  | EPRS    | bifunctional glutamate/proline--tRNA ligase                           | 1.03  | 0.56* | 0.53  | 0 |
| 265 | gi 6005721   | ERLIN2  | erlin-2 isoform 1                                                     | 1.01  | 1.40  | 2.79  | 0 |
| 266 | gi 5803013   | ERP29   | endoplasmic reticulum resident protein 29 isoform 1 precursor         | 1.33  | 1.91* | 2.74* | 0 |
| 267 | gi 52487191  | ERP44   | endoplasmic reticulum resident protein 44 precursor                   | 0.92  | 1.31  | 2.47* | 0 |
| 268 | gi 4503607   | ETFA    | electron transfer flavoprotein subunit alpha, mitochondrial isoform a | 0.88  | 0.86  | 0.13* | 0 |
| 269 | gi 7705612   | EXOSC1  | exosome complex component CSL4                                        | 0.99  | 1.01  | 0.90  | 0 |
| 270 | gi 19923403  | EXOSC2  | exosome complex component RRP4 isoform 1                              | 0.92  | 0.64  | 0.69* | 0 |
| 271 | gi 9506689   | EXOSC4  | exosome complex component RRP41                                       | 0.79  | 1.27  | 1.19  | 0 |
| 272 | gi 189083688 | EXOSC7  | exosome complex component RRP42                                       | 1.15  | 0.92* | 0.94  | 0 |

|     |              |         |                                                               |       |       |       |   |
|-----|--------------|---------|---------------------------------------------------------------|-------|-------|-------|---|
| 273 | gi 21614499  | EZR     | ezrin                                                         | 1.63* | 0.80  | 0.32* | 2 |
| 274 | gi 5901948   | FAF1    | FAS-associated factor 1                                       | 1.02  | 1.22  | 0.68  | 1 |
| 275 | gi 24797106  | FAF2    | FAS-associated factor 2                                       | 1.10  | 0.63  | 0.46  | 1 |
| 276 | gi 16757970  | FAM129A | protein Niban                                                 | 1.60  | 0.64  | 0.42* | 1 |
| 277 | gi 4758220   | FAM50A  | protein FAM50A                                                | 1.08  | 1.01  | 0.36  | 0 |
| 278 | gi 4758340   | FARSA   | phenylalanine--tRNA ligase alpha subunit                      | 0.77  | 1.31  | 0.86  | 1 |
| 279 | gi 124028525 | FARSB   | phenylalanine--tRNA ligase beta subunit                       | 1.07  | 1.26  | 0.88  | 0 |
| 280 | gi 41872631  | FASN    | fatty acid synthase                                           | 1.07* | 0.63* | 0.68  | 1 |
| 281 | gi 12056465  | FBL     | rRNA 2'-O-methyltransferase fibrillarin                       | 0.66  | 0.43  | 1.18  | 1 |
| 282 | gi 4503685   | FDPS    | farnesyl pyrophosphate synthase isoform a                     | 1.40  | 0.63  | 0.53  | 0 |
| 283 | gi 4758356   | FEN1    | flap endonuclease 1                                           | 0.63  | 0.54  | 0.57  | 0 |
| 284 | gi 19743875  | FH      | fumarate hydratase, mitochondrial                             | 1.03  | 0.87  | 1.86* | 0 |
| 285 | gi 192448443 | FKBP10  | peptidyl-prolyl cis-trans isomerase FKBP10 precursor          | 1.34  | 1.69  | 2.02* | 0 |
| 286 | gi 150010552 | FKBP15  | FK506-binding protein 15                                      | 0.47  | 0.80  | 0.33  | 1 |
| 287 | gi 4503725   | FKBP1A  | peptidyl-prolyl cis-trans isomerase FKBP1A isoform a          | 1.28  | 1.59  | 0.40  | 0 |
| 288 | gi 17149842  | FKBP2   | peptidyl-prolyl cis-trans isomerase FKBP2 precursor           | 1.52  | 0.90  | 1.65  | 0 |
| 289 | gi 4503729   | FKBP4   | peptidyl-prolyl cis-trans isomerase FKBP4                     | 1.09  | 1.03* | 0.49  | 0 |
| 290 | gi 4758384   | FKBP5   | peptidyl-prolyl cis-trans isomerase FKBP5 isoform 1           | 0.65  | 0.69  | 0.90  | 0 |
| 291 | gi 52630440  | FKBP8   | peptidyl-prolyl cis-trans isomerase FKBP8 isoform 1           | 1.00  | 0.73  | 0.42  | 0 |
| 292 | gi 33469985  | FKBP9   | peptidyl-prolyl cis-trans isomerase FKBP9 isoform 1 precursor | 1.03  | 1.41  | 1.61* | 1 |

|     |              |         |                                                                 |       |       |       |   |
|-----|--------------|---------|-----------------------------------------------------------------|-------|-------|-------|---|
| 293 | gi 5031699   | FLOT1   | flotillin-1                                                     | 0.81  | 0.87* | 1.82* | 0 |
| 294 | gi 94538362  | FLOT2   | flotillin-2                                                     | 0.69  | 0.82  | 4.47* | 0 |
| 295 | gi 34147540  | FLYWCH2 | FLYWCH family member 2                                          | 0.71  | 1.70  | 0.45* | 0 |
| 296 | gi 4503765   | FMR1    | fragile X mental retardation protein 1 isoform ISO1             | 0.76  | 0.76  | 0.64  | 2 |
| 297 | gi 82546824  | FOXK1   | forkhead box protein K1                                         | 1.24  | 1.11  | 1.07  | 4 |
| 298 | gi 4507115   | FSCN1   | fascin                                                          | 1.30  | 0.72* | 0.59  | 0 |
| 299 | gi 194097365 | FTSJ3   | pre-rRNA processing protein FTSJ3                               | 1.34  | 0.80  | 0.27  | 0 |
| 300 | gi 17402900  | FUBP1   | far upstream element-binding protein 1 isoform 2                | 1.17  | 1.26  | 0.31* | 3 |
| 301 | gi 100816392 | FUBP3   | far upstream element-binding protein 3                          | 1.24  | 0.65  | 0.27* | 1 |
| 302 | gi 4826734   | FUS     | RNA-binding protein FUS isoform 1                               | 1.61  | 1.25  | 0.28  | 0 |
| 303 | gi 5031703   | G3BP1   | ras GTPase-activating protein-binding protein 1                 | 0.59  | 0.57  | 0.78  | 0 |
| 304 | gi 109389365 | G6PD    | glucose-6-phosphate 1-dehydrogenase isoform a                   | 0.81  | 0.44* | 0.75  | 0 |
| 305 | gi 119393891 | GAA     | lysosomal alpha-glucosidase preproprotein                       | 0.99  | 1.06  | 1.56  | 1 |
| 306 | gi 4503895   | GALK1   | galactokinase                                                   | 1.06  | 0.82  | 0.69  | 0 |
| 307 | gi 4758412   | GALNT2  | polypeptide N-acetylgalactosaminyltransferase 2 precursor       | 1.04  | 1.16* | 2*    | 0 |
| 308 | gi 7669492   | GAPDH   | glyceraldehyde-3-phosphate dehydrogenase isoform 1              | 1.36* | 0.74* | 0.30  | 0 |
| 309 | gi 116805340 | GARS    | glycine--tRNA ligase precursor                                  | 1.37  | 0.60  | 0.52* | 0 |
| 310 | gi 4503915   | GART    | trifunctional purine biosynthetic protein adenosine-3 isoform 1 | 0.85  | 0.58* | 0.31* | 0 |
| 311 | gi 54607043  | GBA     | glucosylceramidase isoform 1 precursor                          | 0.88  | 1.22  | 1.5*  | 0 |
| 312 | gi 4504011   | GCLM    | glutamate--cysteine ligase regulatory subunit isoform 1         | 0.76  | 1.15  | 0.23  | 0 |

|     |              |        |                                                                              |       |       |       |   |
|-----|--------------|--------|------------------------------------------------------------------------------|-------|-------|-------|---|
| 313 | gi 54607053  | GCN1L1 | translational activator GCN1                                                 | 1.09* | 0.75  | 0.77  | 1 |
| 314 | gi 49574537  | GCSH   | glycine cleavage system H protein, mitochondrial precursor                   | 0.74  | 1.17  | 0.81  | 0 |
| 315 | gi 4758426   | GDA    | guanine deaminase isoform b                                                  | 0.78  | 0.75* | 0.42  | 0 |
| 316 | gi 4503971   | GDI1   | rab GDP dissociation inhibitor alpha                                         | 0.99  | 1.29  | 0.95  | 0 |
| 317 | gi 6598323   | GDI2   | rab GDP dissociation inhibitor beta isoform 1                                | 0.55  | 0.59  | 0.54  | 0 |
| 318 | gi 4503987   | GGH    | gamma-glutamyl hydrolase precursor                                           | 0.96  | 1.77  | 2.9*  | 0 |
| 319 | gi 118402586 | GLO1   | lactoylglutathione lyase                                                     | 0.72  | 1.20  | 0.13* | 0 |
| 320 | gi 217330598 | GLOD4  | glyoxalase domain-containing protein 4                                       | 1.34  | 0.79  | 0.43  | 0 |
| 321 | gi 95113651  | GLRX3  | glutaredoxin-3                                                               | 0.56  | 1.05  | 0.65  | 0 |
| 322 | gi 42516576  | GLRX5  | glutaredoxin-related protein 5, mitochondrial precursor                      | 0.57  | 0.79  | 0.61  | 0 |
| 323 | gi 4885281   | GLUD1  | glutamate dehydrogenase 1, mitochondrial precursor                           | 1.07  | 1.21  | 1.61  | 0 |
| 324 | gi 4504031   | GMDS   | GDP-mannose 4,6 dehydratase isoform 1                                        | 0.74  | 0.77  | 0.47  | 0 |
| 325 | gi 50541956  | GMPR2  | GMP reductase 2 isoform 1                                                    | 0.79  | 0.61  | 0.74  | 0 |
| 326 | gi 11321585  | GNB1   | guanine nucleotide-binding protein G(I)/G(S)/G(T) subunit beta-1 isoform 1   | 0.78  | 1.10  | 1.71  | 0 |
| 327 | gi 20357529  | GNB2   | guanine nucleotide-binding protein G(I)/G(S)/G(T) subunit beta-2             | 0.91  | 1.09  | 1.16  | 0 |
| 328 | gi 5174447   | GNB2L1 | guanine nucleotide-binding protein subunit beta-2-like 1                     | 1.33  | 0.82  | 0.81  | 0 |
| 329 | gi 11055998  | GNB4   | guanine nucleotide-binding protein subunit beta-4                            | 1.00  | 1.06  | 0.75  | 0 |
| 330 | gi 51036603  | GNG12  | guanine nucleotide-binding protein G(I)/G(S)/G(O) subunit gamma-12 precursor | 0.75  | 0.69  | 0.92  | 0 |
| 331 | gi 13027378  | GNPDA1 | glucosamine-6-phosphate isomerase 1                                          | 1.37  | 1.22  | 1.33  | 0 |
| 332 | gi 4504061   | GNS    | N-acetylglucosamine-6-sulfatase precursor                                    | 0.64  | 1.01  | 1.98* | 0 |

|     |              |         |                                                                             |       |       |       |   |
|-----|--------------|---------|-----------------------------------------------------------------------------|-------|-------|-------|---|
| 333 | gi 30089940  | GOLGA3  | golgin subfamily A member 3 isoform 1                                       | 1.86* | 1.61* | 1.45  | 1 |
| 334 | gi 4504067   | GOT1    | aspartate aminotransferase, cytoplasmic                                     | 0.94  | 0.90  | 0.3*  | 0 |
| 335 | gi 73486658  | GOT2    | aspartate aminotransferase, mitochondrial isoform 1 precursor               | 0.72  | 1.02  | 1.26  | 0 |
| 336 | gi 33356552  | GPATCH4 | G patch domain-containing protein 4 isoform 1                               | 1.66  | 1.66* | 0.29* | 0 |
| 337 | gi 285002231 | GPD2    | glycerol-3-phosphate dehydrogenase, mitochondrial precursor                 | 1.02  | 0.97  | 0.92  | 0 |
| 338 | gi 18201905  | GPI     | glucose-6-phosphate isomerase isoform 2                                     | 0.89  | 0.89  | 0.41* | 0 |
| 339 | gi 15811782  | GPKOW   | G patch domain and KOW motifs-containing protein                            | 0.90  | 0.77  | 0.41  | 0 |
| 340 | gi 46592991  | GRIPAP1 | GRIP1-associated protein 1                                                  | 1.34  | 0.96  | 0.86  | 0 |
| 341 | gi 24308295  | GRPEL1  | grpE protein homolog 1, mitochondrial precursor                             | 0.96  | 1.38  | 1.38  | 0 |
| 342 | gi 149193321 | GRSF1   | G-rich sequence factor 1 isoform 1                                          | 1.00  | 1.00  | 0.47  | 1 |
| 343 | gi 237820620 | GRWD1   | glutamate-rich WD repeat-containing protein 1                               | 0.78  | 0.60  | 0.33  | 1 |
| 344 | gi 194097354 | GSPT1   | eukaryotic peptide chain release factor GTP-binding subunit ERF3A isoform 2 | 0.82  | 0.89  | 0.65  | 1 |
| 345 | gi 4504169   | GSS     | glutathione synthetase                                                      | 1.02  | 1*    | 0.5*  | 0 |
| 346 | gi 23065552  | GSTM3   | glutathione S-transferase Mu 3                                              | 0.50  | 0.44* | 0.94  | 0 |
| 347 | gi 254692934 | GTF2I   | general transcription factor II-I isoform 5                                 | 0.76  | 0.54* | 0.65  | 0 |
| 348 | gi 55953087  | GTPBP4  | nucleolar GTP-binding protein 1                                             | 1.64* | 0.58  | 0.68  | 0 |
| 349 | gi 5174449   | H1FX    | histone H1x                                                                 | 1.06  | 1.04  | 0.39* | 0 |
| 350 | gi 93141018  | H2AFY   | core histone macro-H2A.1 isoform 3                                          | 1.97  | 1.76  | 0.81  | 1 |
| 351 | gi 20127408  | HADHA   | trifunctional enzyme subunit alpha, mitochondrial precursor                 | 1.19* | 0.57* | 0.45* | 0 |
| 352 | gi 4504327   | HADHB   | trifunctional enzyme subunit beta, mitochondrial isoform 1 precursor        | 1.02  | 1.00  | 0.67  | 0 |

|     |             |          |                                                              |       |       |       |   |
|-----|-------------|----------|--------------------------------------------------------------|-------|-------|-------|---|
| 353 | gi 6996014  | HARS     | histidine--tRNA ligase, cytoplasmic isoform 1                | 1.38  | 1.10  | 0.47* | 0 |
| 354 | gi 98986457 | HCFC1    | host cell factor 1                                           | 1.11  | 1.39  | 1.02  | 7 |
| 355 | gi 4758516  | HDGF     | hepatoma-derived growth factor isoform a                     | 2.12* | 1.54  | 0.48  | 0 |
| 356 | gi 4885409  | HDLBP    | vigilin isoform a                                            | 0.89  | 0.85  | 0.16* | 1 |
| 357 | gi 73695475 | HEATR1   | HEAT repeat-containing protein 1                             | 1.95  | 0.72  | 1.01  | 0 |
| 358 | gi 20336761 | HEBP1    | heme-binding protein 1                                       | 0.86  | 1.61  | 0.27* | 0 |
| 359 | gi 4504373  | HEXB     | beta-hexosaminidase subunit beta isoform 1 preproprotein     | 1.11  | 1.18  | 1.85* | 0 |
| 360 | gi 13124773 | HGH1     | protein HGH1 homolog                                         | 1.46  | 1.30  | 0.93  | 0 |
| 361 | gi 23308751 | HIBADH   | 3-hydroxyisobutyrate dehydrogenase, mitochondrial precursor  | 1.03  | 1.39  | 1.13  | 0 |
| 362 | gi 38045919 | HIP1     | huntingtin-interacting protein 1 isoform 1                   | 1.00  | 0.81  | 1.00  | 0 |
| 363 | gi 4885381  | HIST1H1B | histone H1.5                                                 | 0.71  | 1.75  | 0.13* | 0 |
| 364 | gi 4885375  | HIST1H1C | histone H1.2                                                 | 1.00  | 1.84* | 0.14* | 0 |
| 365 | gi 4504301  | HIST1H4A | histone H4                                                   | 2.05* | 1.31  | 0.52* | 0 |
| 366 | gi 15553127 | HK2      | hexokinase-2                                                 | 1.02  | 1.30  | 1.80  | 0 |
| 367 | gi 66933009 | HMBS     | porphobilinogen deaminase isoform 2                          | 1.02  | 1.02  | 0.71  | 0 |
| 368 | gi 4504425  | HMGB1    | high mobility group protein B1                               | 1.12  | 2.08* | 0.73  | 0 |
| 369 | gi 8051608  | HMOX2    | heme oxygenase 2 isoform b                                   | 2.27  | 0.93  | 1.56  | 0 |
| 370 | gi 7705877  | HN1      | hematological and neurological expressed 1 protein isoform 1 | 0.53  | 0.82  | 1.09  | 0 |
| 371 | gi 21700763 | HN1L     | hematological and neurological expressed 1-like protein      | 0.77  | 0.89  | 0.54  | 0 |
| 372 | gi 5803036  | HNRNPA0  | heterogeneous nuclear ribonucleoprotein A0                   | 0.85  | 0.77  | 0.33  | 0 |

|     |              |           |                                                                    |       |       |       |    |
|-----|--------------|-----------|--------------------------------------------------------------------|-------|-------|-------|----|
| 373 | gi 14043072  | HNRNPA2B1 | heterogeneous nuclear ribonucleoproteins A2/B1 isoform B1          | 1.31* | 0.59  | 0.2*  | 0  |
| 374 | gi 34740329  | HNRNPA3   | heterogeneous nuclear ribonucleoprotein A3                         | 1.22* | 0.90  | 0.35  | 1  |
| 375 | gi 55956921  | HNRNPAB   | heterogeneous nuclear ribonucleoprotein A/B isoform b              | 1.37* | 1.06  | 0.21* | 0  |
| 376 | gi 332801090 | HNRNPDL   | heterogeneous nuclear ribonucleoprotein D-like isoform b           | 0.90  | 0.83  | 0.28* | 1  |
| 377 | gi 4826760   | HNRNPF    | heterogeneous nuclear ribonucleoprotein F                          | 1.35  | 0.66  | 0.26* | 0  |
| 378 | gi 5031753   | HNRNPH1   | heterogeneous nuclear ribonucleoprotein H                          | 1.1*  | 0.59  | 0.37  | 0  |
| 379 | gi 9624998   | HNRNPH2   | heterogeneous nuclear ribonucleoprotein H2                         | 1.42  | 1.25  | 0.32  | 0  |
| 380 | gi 14141159  | HNRNPH3   | heterogeneous nuclear ribonucleoprotein H3 isoform b               | 0.96  | 0.38  | 0.32  | 0  |
| 381 | gi 5031755   | HNRNPR    | heterogeneous nuclear ribonucleoprotein R isoform 2                | 0.94  | 0.81  | 0.64  | 5  |
| 382 | gi 14141161  | HNRNPU    | heterogeneous nuclear ribonucleoprotein U isoform b                | 0.89  | 0.49  | 0.64  | 0  |
| 383 | gi 21536326  | HNRNPUL1  | heterogeneous nuclear ribonucleoprotein U-like protein 1 isoform a | 1.26  | 0.61  | 0.23  | 10 |
| 384 | gi 4504477   | HPD       | 4-hydroxyphenylpyruvate dioxygenase isoform 1                      | 0.77* | 0.84  | 0.56* | 0  |
| 385 | gi 14249394  | HPDL      | 4-hydroxyphenylpyruvate dioxygenase-like protein                   | 0.70  | 1.70  | 0.86  | 0  |
| 386 | gi 4504483   | HPRT1     | hypoxanthine-guanine phosphoribosyltransferase                     | 0.62  | 0.76  | 0.35  | 0  |
| 387 | gi 5032215   | HRSP12    | ribonuclease UK114                                                 | 1.13  | 1.82  | 0.95  | 0  |
| 388 | gi 4758504   | HSD17B10  | 3-hydroxyacyl-CoA dehydrogenase type-2 isoform 1                   | 1.54  | 0.79  | 0.2*  | 0  |
| 389 | gi 4504505   | HSD17B4   | peroxisomal multifunctional enzyme type 2 isoform 2                | 1.23  | 0.90  | 0.96  | 0  |
| 390 | gi 40254986  | HSDL2     | hydroxysteroid dehydrogenase-like protein 2 isoform 1              | 1.25  | 0.91  | 0.46  | 0  |
| 391 | gi 431822408 | HSP90AB1æ | heat shock protein HSP 90-beta isoform c                           | 1.34* | 1.01  | 0.25* | 0  |
| 392 | gi 4507677   | HSP90B1   | endoplasmic precursor                                              | 1.24* | 2.37* | 4.15* | 0  |

|     |              |         |                                                                    |       |       |       |   |
|-----|--------------|---------|--------------------------------------------------------------------|-------|-------|-------|---|
| 393 | gi 167466173 | HSPA1A  | heat shock 70 kDa protein 1A/1B                                    | 0.76  | 3.18* | 2.37* | 0 |
| 394 | gi 38327039  | HSPA4   | heat shock 70 kDa protein 4                                        | 0.84  | 0.76* | 0.63  | 0 |
| 395 | gi 31541941  | HSPA4L  | heat shock 70 kDa protein 4L                                       | 1.01  | 1.26  | 0.58* | 0 |
| 396 | gi 16507237  | HSPA5   | 78 kDa glucose-regulated protein precursor                         | 0.91  | 2.93* | 3.5*  | 1 |
| 397 | gi 5729877   | HSPA8   | heat shock cognate 71 kDa protein isoform 1                        | 1.08* | 1.39* | 0.89  | 0 |
| 398 | gi 24234688  | HSPA9   | stress-70 protein, mitochondrial precursor                         | 0.88* | 0.75  | 0.23* | 0 |
| 399 | gi 4504517   | HSPB1   | heat shock protein beta-1                                          | 0.69  | 0.47  | 0.22* | 0 |
| 400 | gi 31542947  | HSPD1   | 60 kDa heat shock protein, mitochondrial                           | 1.13  | 1.9*  | 3.24* | 0 |
| 401 | gi 4504523   | HSPE1   | 10 kDa heat shock protein, mitochondrial                           | 0.98  | 2.39  | 1.9*  | 0 |
| 402 | gi 42544159  | HSPH1   | heat shock protein 105 kDa isoform 1                               | 0.79  | 0.59  | 1.02  | 0 |
| 403 | gi 21361437  | HTATSF1 | HIV Tat-specific factor 1                                          | 1.00  | 0.57* | 0.45  | 0 |
| 404 | gi 61676188  | HUWE1   | E3 ubiquitin-protein ligase HUWE1                                  | 0.84  | 0.96  | 0.89  | 4 |
| 405 | gi 5453832   | HYOU1   | hypoxia up-regulated protein 1 precursor                           | 1.68  | 1.10  | 1.63* | 1 |
| 406 | gi 27734984  | HYPK    | huntingtin-interacting protein K isoform 1                         | 1.13  | 0.76  | 0.84  | 0 |
| 407 | gi 94721239  | IARS    | isoleucine--tRNA ligase, cytoplasmic                               | 1.21  | 0.63  | 0.5*  | 0 |
| 408 | gi 46852147  | IARS2   | isoleucine--tRNA ligase, mitochondrial precursor                   | 0.92  | 0.53  | 0.26* | 0 |
| 409 | gi 167466198 | ICAM1   | intercellular adhesion molecule 1 precursor                        | 1.17  | 1.97  | 2.08* | 0 |
| 410 | gi 29150261  | IFI30   | gamma-interferon-inducible lysosomal thiol reductase preproprotein | 1.77  | 1.14  | 1.06  | 0 |
| 411 | gi 4557663   | IGBP1   | immunoglobulin-binding protein 1                                   | 0.95  | 0.88  | 0.94  | 0 |
| 412 | gi 56237027  | IGF2BP1 | insulin-like growth factor 2 mRNA-binding protein 1 isoform 1      | 0.98  | 0.88  | 0.49  | 1 |

|     |              |          |                                                                                       |       |       |       |   |
|-----|--------------|----------|---------------------------------------------------------------------------------------|-------|-------|-------|---|
| 413 | gi 30795212  | IGF2BP3  | insulin-like growth factor 2 mRNA-binding protein 3                                   | 1.61  | 0.80  | 0.30  | 1 |
| 414 | gi 119964726 | IGF2R    | cation-independent mannose-6-phosphate receptor precursor                             | 0.70  | 0.88  | 1.40  | 1 |
| 415 | gi 55953135  | IGSF3    | immunoglobulin superfamily member 3 isoform 2 precursor                               | 0.63  | 1.24  | 4.83* | 0 |
| 416 | gi 4504653   | IL18     | interleukin-18 isoform 1 proprotein                                                   | 0.56  | 1.27  | 0.66  | 0 |
| 417 | gi 154354966 | IMMT     | MICOS complex subunit MIC60 isoform 3                                                 | 1.15  | 1.24* | 1.58* | 1 |
| 418 | gi 34328930  | IMPDH1   | inosine-5'-monophosphate dehydrogenase 1 isoform a                                    | 1.24  | 0.32* | 0.93* | 1 |
| 419 | gi 66933016  | IMPDH2   | inosine-5'-monophosphate dehydrogenase 2                                              | 1.20  | 0.86  | 0.3*  | 0 |
| 420 | gi 222136583 | INPPL1   | phosphatidylinositol 3,4,5-trisphosphate 5-phosphatase 2                              | 0.80  | 1.17  | 1.87  | 7 |
| 421 | gi 24797086  | IPO5     | importin-5                                                                            | 0.60  | 0.69* | 0.96  | 0 |
| 422 | gi 5453998   | IPO7     | importin-7                                                                            | 0.75  | 0.71  | 2.49  | 0 |
| 423 | gi 4506787   | IQGAP1   | ras GTPase-activating-like protein IQGAP1                                             | 0.76* | 0.59* | 0.68  | 0 |
| 424 | gi 103471987 | ISOC1    | isochorismatase domain-containing protein 1                                           | 0.77  | 0.82  | 0.31  | 0 |
| 425 | gi 19743813  | ITGB1    | integrin beta-1 isoform 1A precursor                                                  | 1.30  | 1.24* | 2.74* | 0 |
| 426 | gi 5031815   | KARS     | lysine--tRNA ligase isoform 2                                                         | 1.45  | 2.77* | 0.37* | 1 |
| 427 | gi 5730027   | KHDRBS1  | KH domain-containing, RNA-binding, signal transduction-associated protein 1 isoform 1 | 1.39* | 0.64* | 0.57* | 4 |
| 428 | gi 154355000 | KHSRP    | far upstream element-binding protein 2                                                | 1.02  | 1.02  | 0.34* | 7 |
| 429 | gi 122937211 | KIAA0368 | proteasome-associated protein ECM29 homolog                                           | 0.81  | 0.93  | 0.49  | 2 |
| 430 | gi 4758648   | KIF5B    | kinesin-1 heavy chain                                                                 | 1.37  | 0.57  | 0.56  | 0 |
| 431 | gi 4504897   | KPNA2    | importin subunit alpha-1                                                              | 0.59  | 0.47* | 1.49  | 0 |
| 432 | gi 4504901   | KPNA4    | importin subunit alpha-3                                                              | 0.86  | 0.93  | 1.23  | 1 |

|     |              |        |                                                                        |       |       |       |   |
|-----|--------------|--------|------------------------------------------------------------------------|-------|-------|-------|---|
| 433 | gi 19923142  | KPNB1  | importin subunit beta-1 isoform 1                                      | 0.71  | 1.01* | 2.14* | 0 |
| 434 | gi 4557701   | KRT17  | keratin, type I cytoskeletal 17                                        | 0.99* | 1.34* | 1.47  | 0 |
| 435 | gi 4557888   | KRT18  | keratin, type I cytoskeletal 18                                        | 0.95* | 0.77  | 1.56* | 0 |
| 436 | gi 47132620  | KRT2   | keratin, type II cytoskeletal 2 epidermal                              | 1.02  | 0.86  | 0.56  | 0 |
| 437 | gi 67782365  | KRT7   | keratin, type II cytoskeletal 7                                        | 0.77* | 0.62  | 0.98  | 0 |
| 438 | gi 4504919   | KRT8   | keratin, type II cytoskeletal 8 isoform 2                              | 1.05* | 0.75  | 1.64* | 0 |
| 439 | gi 55956899  | KRT9   | keratin, type I cytoskeletal 9                                         | 0.37* | 1.37* | 1.30  | 0 |
| 440 | gi 221316760 | L1CAM  | neural cell adhesion molecule L1 isoform 3 precursor                   | 0.91  | 0.86  | 0.90  | 1 |
| 441 | gi 167614504 | LAMB1  | laminin subunit beta-1 precursor                                       | 0.85  | 1.49  | 2.02* | 0 |
| 442 | gi 119703755 | LAMB2  | laminin subunit beta-2 precursor                                       | 0.72* | 1.14  | 0.35* | 0 |
| 443 | gi 112380628 | LAMP1  | lysosome-associated membrane glycoprotein 1 precursor                  | 0.69  | 1.27  | 3.36* | 0 |
| 444 | gi 5174445   | LANCL1 | lanC-like protein 1                                                    | 0.40  | 0.41  | 0.33  | 0 |
| 445 | gi 41393561  | LAP3   | cytosol aminopeptidase                                                 | 1.67  | 1.21  | 0.44* | 0 |
| 446 | gi 108773810 | LARS   | leucine--tRNA ligase, cytoplasmic                                      | 1.50  | 0.71  | 0.5*  | 0 |
| 447 | gi 5453710   | LASP1  | LIM and SH3 domain protein 1 isoform a                                 | 1.33  | 1.21  | 0.22* | 0 |
| 448 | gi 4557032   | LDHB   | L-lactate dehydrogenase B chain                                        | 1.06  | 0.86  | 0.2*  | 0 |
| 449 | gi 4504975   | LDLR   | low-density lipoprotein receptor isoform 1 precursor                   | 0.74  | 1.36  | 3.47* | 0 |
| 450 | gi 31044432  | LEMD2  | LEM domain-containing protein 2 isoform 1                              | 1.06  | 0.62  | 1.65  | 0 |
| 451 | gi 6912482   | LETM1  | LETM1 and EF-hand domain-containing protein 1, mitochondrial precursor | 0.57  | 1.07  | 3.91* | 1 |
| 452 | gi 4504981   | LGALS1 | galectin-1                                                             | 1.57  | 1.23  | 0.88  | 0 |

|     |              |          |                                                                    |       |       |       |   |
|-----|--------------|----------|--------------------------------------------------------------------|-------|-------|-------|---|
| 453 | gi 5031863   | LGALS3BP | galectin-3-binding protein precursor                               | 1.08  | 1.25  | 1.82* | 0 |
| 454 | gi 7705373   | LIMA1    | LIM domain and actin-binding protein 1 isoform 2                   | 0.92  | 1.00  | 0.59* | 1 |
| 455 | gi 7657307   | LIMD1    | LIM domain-containing protein 1                                    | 0.96  | 1.04  | 1.15  | 0 |
| 456 | gi 27436946  | LMNA     | lamin isoform A                                                    | 1.82* | 1.44* | 1.54* | 0 |
| 457 | gi 5031877   | LMNB1    | lamin-B1 isoform 1                                                 | 1.28  | 1.27* | 1.41* | 0 |
| 458 | gi 388240801 | LMNB2    | lamin-B2                                                           | 1.11  | 1.31  | 3.33* | 0 |
| 459 | gi 33598968  | LMO7     | LIM domain only protein 7 isoform 1                                | 0.94  | 1.23  | 0.64  | 2 |
| 460 | gi 21396489  | LONP1    | lon protease homolog, mitochondrial isoform 1 precursor            | 0.92  | 0.52* | 0.19* | 0 |
| 461 | gi 31621305  | LRPPRC   | leucine-rich PPR motif-containing protein, mitochondrial precursor | 0.68  | 0.66  | 0.62  | 0 |
| 462 | gi 40254924  | LRRC59   | leucine-rich repeat-containing protein 59                          | 0.38  | 2.18  | 5.86* | 1 |
| 463 | gi 7657315   | LSM3     | U6 snRNA-associated Sm-like protein LSm3                           | 0.95  | 1.57  | 0.86  | 0 |
| 464 | gi 4505029   | LTA4H    | leukotriene A-4 hydrolase isoform 1                                | 1.46  | 1.28  | 0.53* | 0 |
| 465 | gi 19923485  | LUC7L3   | luc7-like protein 3                                                | 0.96  | 0.56  | 0.76  | 0 |
| 466 | gi 4505061   | M6PR     | cation-dependent mannose-6-phosphate receptor isoform 1 precursor  | 0.68  | 0.91  | 3.19  | 0 |
| 467 | gi 33188445  | MACF1    | microtubule-actin cross-linking factor 1                           | 0.85  | 0.97  | 0.98  | 2 |
| 468 | gi 19387846  | MAGED2   | melanoma-associated antigen D2                                     | 1.40  | 0.57  | 1.13  | 1 |
| 469 | gi 51873064  | MAN2B1   | lysosomal alpha-mannosidase isoform 1 precursor                    | 0.78  | 0.98  | 1.43  | 0 |
| 470 | gi 197276600 | MAP4     | microtubule-associated protein 4 isoform 4                         | 1.19  | 1.18  | 0.25* | 1 |
| 471 | gi 153070260 | MARCKS   | myristoylated alanine-rich C-kinase substrate                      | 1.05  | 1.67* | 1.02  | 0 |
| 472 | gi 14043022  | MARS     | methionine--tRNA ligase, cytoplasmic                               | 1.08  | 0.52  | 0.98* | 1 |

|     |              |           |                                                               |       |       |       |   |
|-----|--------------|-----------|---------------------------------------------------------------|-------|-------|-------|---|
| 473 | gi 5174529   | MAT2A     | S-adenosylmethionine synthase isoform type-2                  | 0.96  | 0.89  | 0.4*  | 0 |
| 474 | gi 21626466  | MATR3     | matrin-3 isoform a                                            | 0.76  | 0.29  | 0.60  | 1 |
| 475 | gi 71274107  | MCAM      | cell surface glycoprotein MUC18 precursor                     | 1.35  | 0.67  | 2.04  | 1 |
| 476 | gi 33356547  | MCM2      | DNA replication licensing factor MCM2                         | 0.63  | 0.47* | 0.48  | 0 |
| 477 | gi 33469917  | MCM4      | DNA replication licensing factor MCM4                         | 1.01  | 0.62  | 0.70  | 0 |
| 478 | gi 23510448  | MCM5      | DNA replication licensing factor MCM5                         | 1.53  | 0.59* | 0.4*  | 0 |
| 479 | gi 7427519   | MCM6      | DNA replication licensing factor MCM6                         | 0.85  | 0.44  | 0.59  | 0 |
| 480 | gi 33469968  | MCM7      | DNA replication licensing factor MCM7 isoform 1               | 1.02* | 0.72  | 0.36* | 0 |
| 481 | gi 5174539   | MDH1      | malate dehydrogenase, cytoplasmic isoform 2                   | 0.89  | 0.70  | 0.3*  | 0 |
| 482 | gi 21735621  | MDH2      | malate dehydrogenase, mitochondrial isoform 1 precursor       | 1.40  | 1.89* | 1.36* | 0 |
| 483 | gi 4505145   | ME2       | NAD-dependent malic enzyme, mitochondrial isoform 1 precursor | 1.81  | 3.68* | 1.85  | 0 |
| 484 | gi 74136552  | MESDC2    | LDLR chaperone MESD precursor                                 | 1.07  | 1.86  | 1.97* | 2 |
| 485 | gi 5803092   | METAP2    | methionine aminopeptidase 2                                   | 1.55  | 1.30  | 0.35* | 0 |
| 486 | gi 122891870 | MIA3      | melanoma inhibitory activity protein 3 isoform 1 precursor    | 1.28  | 1.13  | 2.07* | 7 |
| 487 | gi 4505185   | MIF       | macrophage migration inhibitory factor                        | 0.72  | 2.10  | 0.14  | 0 |
| 488 | gi 27735067  | MISP      | mitotic interactor and substrate of PLK1                      | 1.05  | 1.26  | 0.52  | 0 |
| 489 | gi 31317305  | MPHOSPH10 | U3 small nucleolar ribonucleoprotein protein MPP10            | 2.45  | 0.71  | 0.83  | 0 |
| 490 | gi 61835204  | MPST      | 3-mercaptopyruvate sulfurtransferase isoform 2                | 1.56* | 1.23  | 0.56  | 0 |
| 491 | gi 27436901  | MRPL12    | 39S ribosomal protein L12, mitochondrial                      | 0.55  | 0.98  | 1.45  | 0 |
| 492 | gi 26638659  | MRPL40    | 39S ribosomal protein L40, mitochondrial                      | 1.20  | 0.53  | 0.61  | 0 |

|     |              |         |                                                                                |      |       |       |   |
|-----|--------------|---------|--------------------------------------------------------------------------------|------|-------|-------|---|
| 493 | gi 12597661  | MRPL44  | 39S ribosomal protein L44, mitochondrial                                       | 2.61 | 0.77  | 2.66  | 1 |
| 494 | gi 186928854 | MRPS31  | 28S ribosomal protein S31, mitochondrial                                       | 0.69 | 0.72  | 1.09  | 0 |
| 495 | gi 18490987  | MRTO4   | mRNA turnover protein 4 homolog                                                | 0.85 | 0.91  | 1.20  | 0 |
| 496 | gi 4557761   | MSH2    | DNA mismatch repair protein Msh2 isoform 1                                     | 0.81 | 0.76* | 0.43  | 0 |
| 497 | gi 4505257   | MSN     | moesin                                                                         | 1.19 | 0.98  | 0.38* | 0 |
| 498 | gi 15011880  | MST4    | serine/threonine-protein kinase 26 isoform 1                                   | 1.53 | 1.11  | 0.24  | 0 |
| 499 | gi 14141170  | MTA2    | metastasis-associated protein MTA2                                             | 1.05 | 0.64  | 1.03  | 0 |
| 500 | gi 47132622  | MTAP    | S-methyl-5'-thioadenosine phosphorylase                                        | 0.72 | 2.03  | 0.30  | 0 |
| 501 | gi 222136639 | MTHFD1  | C-1-tetrahydrofolate synthase, cytoplasmic                                     | 1.26 | 0.70  | 0.26* | 0 |
| 502 | gi 36796743  | MTHFD1L | monofunctional C1-tetrahydrofolate synthase, mitochondrial isoform 2 precursor | 0.85 | 0.45* | 0.36* | 0 |
| 503 | gi 169790956 | MTRR    | methionine synthase reductase isoform 2                                        | 1.12 | 0.65  | 1.31  | 0 |
| 504 | gi 19913410  | MVP     | major vault protein isoform 1                                                  | 0.58 | 1.07  | 2.84* | 0 |
| 505 | gi 12667788  | MYH9    | myosin-9                                                                       | 1.16 | 1.47* | 2.63* | 0 |
| 506 | gi 17149828  | NAA15   | N-alpha-acetyltransferase 15, NatA auxiliary subunit                           | 1.29 | 0.91  | 1.13  | 0 |
| 507 | gi 333033787 | NACA    | nascent polypeptide-associated complex subunit alpha isoform a                 | 0.74 | 1.16  | 0.39  | 1 |
| 508 | gi 5031977   | NAMPT   | nicotinamide phosphoribosyltransferase precursor                               | 1.15 | 0.64* | 0.53  | 0 |
| 509 | gi 12056473  | NANS    | sialic acid synthase                                                           | 1.34 | 0.41  | 0.32  | 0 |
| 510 | gi 4758756   | NAP1L1  | nucleosome assembly protein 1-like 1 isoform 1                                 | 0.84 | 1.02  | 2.51* | 0 |
| 511 | gi 5174613   | NAP1L4  | nucleosome assembly protein 1-like 4                                           | 0.66 | 1.55  | 0.81  | 0 |
| 512 | gi 194394158 | NAPRT1  | nicotinate phosphoribosyltransferase isoform 1                                 | 0.81 | 0.62  | 0.22* | 0 |

|     |              |        |                                                             |      |       |       |   |
|-----|--------------|--------|-------------------------------------------------------------|------|-------|-------|---|
| 513 | gi 4758762   | NARS   | asparagine--tRNA ligase, cytoplasmic                        | 0.85 | 0.72* | 0.41* | 0 |
| 514 | gi 27262628  | NASP   | nuclear autoantigenic sperm protein isoform 2               | 0.77 | 1.22  | 0.68  | 0 |
| 515 | gi 68051721  | NCEH1  | neutral cholesterol ester hydrolase 1 isoform b             | 1.11 | 1.18  | 1.33  | 0 |
| 516 | gi 55956788  | NCL    | nucleolin                                                   | 1.40 | 1.45  | 0.28* | 1 |
| 517 | gi 24638433  | NCSTN  | nicastrin isoform 1 precursor                               | 1.47 | 1.12  | 2.12  | 0 |
| 518 | gi 37655183  | NDRG1  | protein NDRG1 isoform 1                                     | 0.80 | 0.87  | 1.12  | 0 |
| 519 | gi 7019545   | NENF   | neudesin precursor                                          | 1.03 | 1.95* | 2.9*  | 0 |
| 520 | gi 38176300  | NES    | nestin                                                      | 0.77 | 1.06  | 1.51  | 1 |
| 521 | gi 117320531 | NFKB2  | nuclear factor NF-kappa-B p100 subunit isoform a            | 1.00 | 0.99  | 0.68  | 1 |
| 522 | gi 42476013  | NHLRC2 | NHL repeat-containing protein 2                             | 1.18 | 0.71* | 0.57  | 0 |
| 523 | gi 4826860   | NHP2L1 | NHP2-like protein 1                                         | 1.58 | 1.14  | 1.08  | 0 |
| 524 | gi 222352111 | NIFK   | MKI67 FHA domain-interacting nucleolar phosphoprotein       | 0.81 | 0.63  | 0.52  | 0 |
| 525 | gi 9910460   | NIT2   | omega-amidase NIT2                                          | 1.43 | 2.00  | 0.50  | 0 |
| 526 | gi 10835073  | NMT1   | glycylpeptide N-tetradecanoyltransferase 1                  | 1*   | 0.66* | 0.80  | 0 |
| 527 | gi 5453790   | NNMT   | nicotinamide N-methyltransferase                            | 0.73 | 0.58  | 0.30  | 0 |
| 528 | gi 7661532   | NOB1   | RNA-binding protein NOB1                                    | 1.04 | 0.51* | 0.44  | 0 |
| 529 | gi 148596949 | NOLC1  | nucleolar and coiled-body phosphoprotein 1 isoform 2        | 0.87 | 0.70  | 0.48* | 3 |
| 530 | gi 34932414  | NONO   | non-POU domain-containing octamer-binding protein isoform 1 | 0.85 | 0.92  | 0.96  | 1 |
| 531 | gi 148747209 | NOP16  | nucleolar protein 16 isoform 3                              | 0.98 | 0.91  | 0.55  | 0 |
| 532 | gi 32483374  | NOP56  | nucleolar protein 56                                        | 1.13 | 0.89  | 0.34  | 0 |

|     |              |        |                                                                  |      |       |       |   |
|-----|--------------|--------|------------------------------------------------------------------|------|-------|-------|---|
| 533 | gi 24041035  | NOTCH2 | neurogenic locus notch homolog protein 2 isoform 1 preproprotein | 0.68 | 1.18  | 8.87  | 0 |
| 534 | gi 158937236 | NPEPPS | puromycin-sensitive aminopeptidase                               | 0.95 | 0.5*  | 0.36* | 1 |
| 535 | gi 157426879 | NPLOC4 | nuclear protein localization protein 4 homolog                   | 2.16 | 1.12  | 0.34  | 0 |
| 536 | gi 10835063  | NPM1   | nucleophosmin isoform 1                                          | 0.73 | 1.05  | 0.95  | 0 |
| 537 | gi 6857818   | NPM3   | nucleoplasmin-3                                                  | 1.21 | 1.04  | 1.00  | 0 |
| 538 | gi 156564401 | NSF    | vesicle-fusing ATPase                                            | 0.82 | 0.58  | 0.73  | 0 |
| 539 | gi 332078466 | NSFL1C | NSFL1 cofactor p47 isoform d                                     | 1.04 | 0.99  | 0.80  | 0 |
| 540 | gi 39995082  | NSUN2  | tRNA (cytosine(34)-C(5))-methyltransferase isoform 1             | 1.08 | 0.68* | 0.4*  | 1 |
| 541 | gi 38570156  | NT5DC1 | 5'-nucleotidase domain-containing protein 1                      | 1.85 | 0.77  | 0.71  | 0 |
| 542 | gi 6912540   | NUBP2  | cytosolic Fe-S cluster assembly factor NUBP2 isoform 1           | 0.79 | 0.24  | 0.86  | 0 |
| 543 | gi 20070228  | NUCB1  | nucleobindin-1 precursor                                         | 0.49 | 0.86  | 1.64  | 0 |
| 544 | gi 5729953   | NUDC   | nuclear migration protein nudC                                   | 0.70 | 0.91  | 0.41  | 0 |
| 545 | gi 21687129  | NUDCD2 | nudC domain-containing protein 2                                 | 1.05 | 1.21  | 0.69  | 0 |
| 546 | gi 37594464  | NUDT5  | ADP-sugar pyrophosphatase                                        | 0.76 | 1.31  | 0.51* | 0 |
| 547 | gi 71361682  | NUMA1  | nuclear mitotic apparatus protein 1 isoform 1                    | 0.85 | 1.19  | 1.05  | 0 |
| 548 | gi 24430149  | NUP155 | nuclear pore complex protein Nup155 isoform 1                    | 0.64 | 0.72  | 1.34  | 1 |
| 549 | gi 27477134  | NUP210 | nuclear pore membrane glycoprotein 210 precursor                 | 1.03 | 0.81  | 1.58* | 0 |
| 550 | gi 33946327  | NUP214 | nuclear pore complex protein Nup214                              | 1.57 | 2.12  | 4.27  | 1 |
| 551 | gi 38605733  | NUP43  | nucleoporin Nup43                                                | 1.10 | 1.22  | 1.65  | 0 |
| 552 | gi 24497451  | NUP50  | nuclear pore complex protein Nup50 isoform b                     | 1.01 | 0.75  | 0.97  | 0 |

|     |              |        |                                                                           |       |       |       |   |
|-----|--------------|--------|---------------------------------------------------------------------------|-------|-------|-------|---|
| 553 | gi 208609990 | NUP93  | nuclear pore complex protein Nup93 isoform 1                              | 1.10  | 0.78  | 2.52* | 0 |
| 554 | gi 5031985   | NUTF2  | nuclear transport factor 2                                                | 0.75  | 0.71  | 0.20  | 0 |
| 555 | gi 15487670  | NXF1   | nuclear RNA export factor 1 isoform 1                                     | 0.98  | 0.73  | 1.12  | 1 |
| 556 | gi 33149331  | NXN    | nucleoredoxin isoform 1                                                   | 1.45  | 0.87  | 0.88  | 0 |
| 557 | gi 4557809   | OAT    | ornithine aminotransferase, mitochondrial isoform 1 precursor             | 0.59  | 0.50  | 0.89  | 0 |
| 558 | gi 51873036  | OGDH   | 2-oxoglutarate dehydrogenase, mitochondrial isoform 1 precursor           | 1.20  | 1.13  | 1.96  | 0 |
| 559 | gi 58761500  | OLA1   | obg-like ATPase 1 isoform 1                                               | 0.89  | 1.03  | 0.67* | 1 |
| 560 | gi 4557817   | OXCT1  | succinyl-CoA:3-ketoacid coenzyme A transferase 1, mitochondrial precursor | 1.42  | 0.75  | 0.86  | 0 |
| 561 | gi 4826878   | OXSR1  | serine/threonine-protein kinase OSR1                                      | 1.58* | 0.94  | 0.39  | 0 |
| 562 | gi 20070125  | P4HB   | protein disulfide-isomerase precursor                                     | 0.88* | 2.81* | 3.39* | 0 |
| 563 | gi 124494254 | PA2G4  | proliferation-associated protein 2G4                                      | 1.12* | 1.11* | 0.35* | 0 |
| 564 | gi 46367787  | PABPC1 | polyadenylate-binding protein 1                                           | 1.19  | 0.61  | 1.27  | 0 |
| 565 | gi 19224660  | PACSN3 | protein kinase C and casein kinase substrate in neurons protein 3         | 0.73  | 0.87  | 1.14  | 1 |
| 566 | gi 5453539   | PAICS  | multifunctional protein ADE2 isoform 2                                    | 0.73  | 0.89  | 0.46* | 0 |
| 567 | gi 31543380  | PARK7  | protein DJ-1                                                              | 1.15  | 0.94  | 0.28  | 0 |
| 568 | gi 19923830  | PBXIP1 | pre-B-cell leukemia transcription factor-interacting protein 1            | 0.92  | 1.10  | 1.73  | 0 |
| 569 | gi 106049292 | PC     | pyruvate carboxylase, mitochondrial precursor                             | 0.82  | 0.55  | 0.19* | 1 |
| 570 | gi 222352151 | PCBP1  | poly(rC)-binding protein 1                                                | 0.92  | 0.75  | 0.40  | 0 |
| 571 | gi 354983493 | PCMT1  | protein-L-isoaspartate(D-aspartate) O-methyltransferase isoform 2         | 1.97  | 1.01  | 0.4*  | 0 |
| 572 | gi 4505641   | PCNA   | proliferating cell nuclear antigen                                        | 0.89  | 1.26* | 0.49* | 0 |

|     |              |        |                                                                         |       |       |       |   |
|-----|--------------|--------|-------------------------------------------------------------------------|-------|-------|-------|---|
| 573 | gi 9966827   | PCNP   | PEST proteolytic signal-containing nuclear protein                      | 1.06  | 1.23  | 0.16* | 0 |
| 574 | gi 166795301 | PCYOX1 | prenylcysteine oxidase 1 precursor                                      | 1.21  | 1.73  | 1.75  | 0 |
| 575 | gi 7657441   | PDAP1  | 28 kDa heat- and acid-stable phosphoprotein                             | 1.00  | 0.91  | 0.48  | 0 |
| 576 | gi 70980549  | PDCD11 | protein RRP5 homolog                                                    | 0.84  | 0.63  | 0.63  | 0 |
| 577 | gi 313760537 | PDCD4  | programmed cell death protein 4 isoform 3                               | 0.97* | 0.33* | 0.15* | 0 |
| 578 | gi 4759224   | PDCD5  | programmed cell death protein 5                                         | 0.86  | 0.83  | 0.27* | 0 |
| 579 | gi 7019485   | PDCD6  | programmed cell death protein 6 isoform 1                               | 0.64  | 0.63  | 3.5*  | 0 |
| 580 | gi 189027129 | PDE12  | 2',5'-phosphodiesterase 12                                              | 0.87  | 0.90  | 0.81  | 0 |
| 581 | gi 21361657  | PDIA3  | protein disulfide-isomerase A3 precursor                                | 1.07  | 1.56* | 3.34* | 0 |
| 582 | gi 4758304   | PDIA4  | protein disulfide-isomerase A4 precursor                                | 1.07* | 2.48  | 2.72* | 1 |
| 583 | gi 5031973   | PDIA6  | protein disulfide-isomerase A6 isoform d precursor                      | 1.15  | 1.51  | 2.14* | 1 |
| 584 | gi 13994151  | PDLIM1 | PDZ and LIM domain protein 1                                            | 1.11  | 0.68* | 0.43  | 0 |
| 585 | gi 190341074 | PDXDC1 | pyridoxal-dependent decarboxylase domain-containing protein 1 isoform 1 | 0.71  | 0.66  | 0.47  | 0 |
| 586 | gi 4505701   | PDXK   | pyridoxal kinase                                                        | 1.5*  | 1.08  | 0.57  | 0 |
| 587 | gi 4505621   | PEBP1  | phosphatidylethanolamine-binding protein 1                              | 0.82* | 0.87  | 0.3*  | 0 |
| 588 | gi 31657129  | PFAS   | phosphoribosylformylglycinamide synthase                                | 1.00  | 0.96  | 0.88  | 1 |
| 589 | gi 22202633  | PFDN5  | prefoldin subunit 5 isoform alpha                                       | 1.06  | 0.89  | 0.78  | 0 |
| 590 | gi 7657162   | PFDN6  | prefoldin subunit 6                                                     | 1.94  | 1.74  | 0.33* | 0 |
| 591 | gi 48762920  | PFKL   | ATP-dependent 6-phosphofructokinase, liver type isoform b               | 0.64  | 0.96  | 1.09  | 0 |
| 592 | gi 4826898   | PFN1   | profilin-1                                                              | 1.00  | 0.71  | 0.34* | 0 |

|     |              |        |                                                                      |       |       |       |   |
|-----|--------------|--------|----------------------------------------------------------------------|-------|-------|-------|---|
| 593 | gi 4505753   | PGAM1  | phosphoglycerate mutase 1                                            | 1.08  | 0.99  | 0.19* | 1 |
| 594 | gi 281604138 | PGAM5  | serine/threonine-protein phosphatase PGAM5, mitochondrial isoform 2  | 0.87  | 1.05  | 0.74  | 0 |
| 595 | gi 40068518  | PGD    | 6-phosphogluconate dehydrogenase, decarboxylating isoform 1          | 0.75  | 0.47  | 0.50  | 0 |
| 596 | gi 4505763   | PGK1   | phosphoglycerate kinase 1                                            | 1.05  | 0.89  | 0.22* | 0 |
| 597 | gi 6912586   | PGLS   | 6-phosphogluconolactonase                                            | 1.22  | 0.99  | 0.27* | 1 |
| 598 | gi 21361621  | PGM1   | phosphoglucomutase-1 isoform 1                                       | 0.98  | 0.82  | 0.24* | 0 |
| 599 | gi 108796653 | PGP    | phosphoglycolate phosphatase                                         | 1.01  | 0.82  | 0.47  | 0 |
| 600 | gi 5729875   | PGRMC1 | membrane-associated progesterone receptor component 1 isoform 1      | 0.75  | 1.75  | 2.72* | 1 |
| 601 | gi 4505773   | PHB    | prohibitin isoform 1                                                 | 1.12* | 1.2*  | 2.48* | 0 |
| 602 | gi 221307584 | PHB2   | prohibitin-2 isoform 1                                               | 0.96  | 1.15  | 1.25* | 0 |
| 603 | gi 23308577  | PHGDH  | D-3-phosphoglycerate dehydrogenase                                   | 1.27* | 0.72* | 0.38* | 0 |
| 604 | gi 4505823   | PIR    | pirin                                                                | 0.79  | 1.29  | 0.42  | 0 |
| 605 | gi 33286418  | PKM-a  | pyruvate kinase PKM isoform a                                        | 1.12  | 0.98  | 0.58* | 0 |
| 606 | gi 332164775 | PKM-c  | pyruvate kinase PKM isoform c                                        | 1.00  | 1.06* | 0.49  | 0 |
| 607 | gi 5453974   | PKN2   | serine/threonine-protein kinase N2                                   | 0.89  | 0.80  | 0.26* | 1 |
| 608 | gi 32307144  | PLOD1  | procollagen-lysine,2-oxoglutarate 5-dioxygenase 1 precursor          | 1.07  | 2.12* | 2.25* | 0 |
| 609 | gi 4505891   | PLOD3  | procollagen-lysine,2-oxoglutarate 5-dioxygenase 3 precursor          | 0.93  | 1.50  | 3.3*  | 1 |
| 610 | gi 7549809   | PLS3   | plastin-3 isoform 1                                                  | 0.84  | 0.74  | 0.37* | 0 |
| 611 | gi 4557839   | PMM2   | phosphomannomutase 2                                                 | 0.9*  | 0.75* | 0.58  | 0 |
| 612 | gi 24308013  | PMPCA  | mitochondrial-processing peptidase subunit alpha isoform 1 precursor | 1.75  | 0.57  | 1.13  | 0 |

|     |              |         |                                                                                   |       |       |       |   |
|-----|--------------|---------|-----------------------------------------------------------------------------------|-------|-------|-------|---|
| 613 | gi 94538354  | PMPCB   | mitochondrial-processing peptidase subunit beta precursor                         | 0.70  | 0.72  | 0.75  | 0 |
| 614 | gi 157168362 | PNP     | purine nucleoside phosphorylase                                                   | 0.91  | 1.27  | 0.53  | 0 |
| 615 | gi 4505941   | POLR2B  | DNA-directed RNA polymerase II subunit RPB2 isoform 1                             | 1.07  | 0.82  | 0.87  | 0 |
| 616 | gi 127139033 | POR     | NADPH--cytochrome P450 reductase                                                  | 0.81  | 0.57  | 1.13  | 0 |
| 617 | gi 11056044  | PPA1    | inorganic pyrophosphatase                                                         | 1.92  | 0.93  | 0.35  | 1 |
| 618 | gi 29570798  | PPAT    | amidophosphoribosyltransferase proprotein                                         | 0.72  | 1.07  | 0.76  | 0 |
| 619 | gi 10863927  | PPIA    | peptidyl-prolyl cis-trans isomerase A isoform 1                                   | 0.96  | 0.65* | 0.19* | 0 |
| 620 | gi 4758950   | PPIB    | peptidyl-prolyl cis-trans isomerase B precursor                                   | 0.79  | 0.95* | 2.72* | 0 |
| 621 | gi 5174637   | PPIE    | peptidyl-prolyl cis-trans isomerase E isoform 1                                   | 0.72  | 0.81  | 1.91  | 0 |
| 622 | gi 29826282  | PPM1G   | protein phosphatase 1G                                                            | 1.13  | 1.73  | 0.53  | 0 |
| 623 | gi 145386517 | PPP1R18 | phostensin                                                                        | 0.98  | 1.16  | 0.65  | 2 |
| 624 | gi 4506017   | PPP2CA  | serine/threonine-protein phosphatase 2A catalytic subunit alpha isoform           | 1.45* | 0.67  | 0.22* | 0 |
| 625 | gi 21361399  | PPP2R1A | serine/threonine-protein phosphatase 2A 65 kDa regulatory subunit A alpha isoform | 1.19  | 0.58  | 1.00  | 0 |
| 626 | gi 4506027   | PPP4C   | serine/threonine-protein phosphatase 4 catalytic subunit isoform 1                | 0.73  | 0.67  | 0.81  | 0 |
| 627 | gi 4826934   | PPP4R1  | serine/threonine-protein phosphatase 4 regulatory subunit 1 isoform b             | 0.64  | 0.58* | 1.25* | 0 |
| 628 | gi 5453958   | PPP5C   | serine/threonine-protein phosphatase 5 isoform 1                                  | 1.03  | 1.35  | 0.48  | 0 |
| 629 | gi 4505591   | PRDX1   | peroxiredoxin-1                                                                   | 0.78  | 1.02  | 0.22* | 0 |
| 630 | gi 32189392  | PRDX2   | peroxiredoxin-2                                                                   | 1.19  | 0.90  | 0.29* | 0 |
| 631 | gi 5802974   | PRDX3   | thioredoxin-dependent peroxide reductase, mitochondrial isoform a precursor       | 0.33  | 0.79* | 1.20  | 0 |
| 632 | gi 5453549   | PRDX4   | peroxiredoxin-4 precursor                                                         | 0.95  | 1.15  | 2.1*  | 0 |

|     |              |         |                                                                         |       |       |       |   |
|-----|--------------|---------|-------------------------------------------------------------------------|-------|-------|-------|---|
| 633 | gi 6912238   | PRDX5   | peroxiredoxin-5, mitochondrial isoform a precursor                      | 1.15  | 1.06  | 0.37* | 0 |
| 634 | gi 4758638   | PRDX6   | peroxiredoxin-6                                                         | 0.83* | 0.74  | 0.24* | 0 |
| 635 | gi 41349456  | PREP    | prolyl endopeptidase                                                    | 0.81  | 0.96  | 0.69  | 0 |
| 636 | gi 4506063   | PRKAR1A | cAMP-dependent protein kinase type I-alpha regulatory subunit isoform a | 1.65  | 0.36  | 0.36  | 1 |
| 637 | gi 4758958   | PRKAR2A | cAMP-dependent protein kinase type II-alpha regulatory subunit          | 1.21  | 1.02  | 0.52  | 1 |
| 638 | gi 48255891  | PRKCSH  | glucosidase 2 subunit beta isoform 2 precursor                          | 1.46  | 2.37* | 2.4*  | 1 |
| 639 | gi 20070220  | PRMT5   | protein arginine N-methyltransferase 5 isoform a                        | 0.96  | 0.92  | 0.54  | 1 |
| 640 | gi 7657381   | PRPF19  | pre-mRNA-processing factor 19                                           | 0.74  | 1.05  | 1.15  | 0 |
| 641 | gi 4758556   | PRPF3   | U4/U6 small nuclear ribonucleoprotein Prp3                              | 0.73  | 0.98  | 0.79  | 1 |
| 642 | gi 91208426  | PRPF8   | pre-mRNA-processing-splicing factor 8                                   | 1.12  | 0.68  | 2.14  | 1 |
| 643 | gi 84875539  | PRPS2   | ribose-phosphate pyrophosphokinase 2 isoform 1                          | 0.90  | 0.77  | 0.60  | 0 |
| 644 | gi 194018537 | PRPSAP1 | phosphoribosyl pyrophosphate synthase-associated protein 1              | 1.04  | 0.95  | 0.66* | 2 |
| 645 | gi 4506133   | PRPSAP2 | phosphoribosyl pyrophosphate synthase-associated protein 2 isoform 1    | 0.71  | 0.71  | 0.91  | 0 |
| 646 | gi 11386147  | PSAP    | prosaposin isoform a preproprotein                                      | 0.77  | 1.25  | 1.82* | 0 |
| 647 | gi 17402893  | PSAT1   | phosphoserine aminotransferase isoform 1                                | 0.67  | 0.58  | 0.63* | 0 |
| 648 | gi 19923653  | PSIP1   | PC4 and SFRS1-interacting protein isoform 2                             | 0.82  | 0.93  | 0.68  | 0 |
| 649 | gi 4506181   | PSMA2   | proteasome subunit alpha type-2                                         | 0.95  | 0.93* | 0.32  | 0 |
| 650 | gi 4506183   | PSMA3   | proteasome subunit alpha type-3 isoform 1                               | 0.68  | 1.11  | 0.39  | 0 |
| 651 | gi 4506185   | PSMA4   | proteasome subunit alpha type-4 isoform 1                               | 0.40  | 0.81  | 0.31  | 0 |
| 652 | gi 23110942  | PSMA5   | proteasome subunit alpha type-5 isoform 1                               | 1.05  | 0.92  | 0.37  | 0 |

|     |              |        |                                                           |      |       |       |   |
|-----|--------------|--------|-----------------------------------------------------------|------|-------|-------|---|
| 653 | gi 23110944  | PSMA6  | proteasome subunit alpha type-6 isoform a                 | 1.10 | 0.76  | 0.39* | 0 |
| 654 | gi 4506189   | PSMA7  | proteasome subunit alpha type-7                           | 0.91 | 0.84  | 0.68  | 0 |
| 655 | gi 4506193   | PSMB1  | proteasome subunit beta type-1                            | 0.98 | 1.08  | 0.78  | 0 |
| 656 | gi 4506195   | PSMB2  | proteasome subunit beta type-2 isoform 1                  | 1.00 | 1.12  | 0.78  | 0 |
| 657 | gi 22538465  | PSMB3  | proteasome subunit beta type-3                            | 0.57 | 1.08  | 0.52  | 0 |
| 658 | gi 22538467  | PSMB4  | proteasome subunit beta type-4                            | 1.18 | 0.93  | 0.53* | 0 |
| 659 | gi 4506201   | PSMB5  | proteasome subunit beta type-5 isoform 1                  | 1.13 | 0.97  | 0.94  | 0 |
| 660 | gi 23110925  | PSMB6  | proteasome subunit beta type-6 isoform 1 proprotein       | 0.73 | 0.77  | 0.82  | 0 |
| 661 | gi 4506203   | PSMB7  | proteasome subunit beta type-7 proprotein                 | 0.71 | 0.94  | 0.61  | 0 |
| 662 | gi 24430151  | PSMC1  | 26S protease regulatory subunit 4                         | 0.96 | 0.52  | 0.71  | 0 |
| 663 | gi 4506209   | PSMC2  | 26S protease regulatory subunit 7 isoform 1               | 1.20 | 0.74  | 0.64  | 0 |
| 664 | gi 21361144  | PSMC3  | 26S protease regulatory subunit 6A                        | 0.96 | 0.86  | 0.80  | 0 |
| 665 | gi 5729991   | PSMC4  | 26S protease regulatory subunit 6B isoform 1              | 1.09 | 0.39* | 0.58  | 0 |
| 666 | gi 312596881 | PSMC5  | 26S protease regulatory subunit 8 isoform 2               | 1.04 | 0.88  | 0.74  | 1 |
| 667 | gi 195539395 | PSMC6  | 26S protease regulatory subunit 10B                       | 1.18 | 1.09  | 0.74  | 0 |
| 668 | gi 4506221   | PSMD12 | 26S proteasome non-ATPase regulatory subunit 12 isoform 1 | 0.49 | 0.41  | 2.83  | 0 |
| 669 | gi 25777602  | PSMD2  | 26S proteasome non-ATPase regulatory subunit 2 isoform 1  | 1.17 | 0.66  | 1.27  | 0 |
| 670 | gi 25777612  | PSMD3  | 26S proteasome non-ATPase regulatory subunit 3            | 0.71 | 0.59  | 1.54  | 2 |
| 671 | gi 4826952   | PSMD5  | 26S proteasome non-ATPase regulatory subunit 5 isoform 1  | 0.56 | 1.11  | 1.08  | 0 |
| 672 | gi 7661914   | PSMD6  | 26S proteasome non-ATPase regulatory subunit 6 isoform 2  | 0.71 | 0.44  | 1.76  | 0 |

|     |              |        |                                                              |      |       |       |   |
|-----|--------------|--------|--------------------------------------------------------------|------|-------|-------|---|
| 673 | gi 25777615  | PSMD7  | 26S proteasome non-ATPase regulatory subunit 7               | 0.71 | 0.85  | 0.94  | 0 |
| 674 | gi 156631005 | PSMD8  | 26S proteasome non-ATPase regulatory subunit 8               | 0.73 | 1.36  | 4.25* | 0 |
| 675 | gi 18543329  | PSMD9  | 26S proteasome non-ATPase regulatory subunit 9 isoform 1     | 0.87 | 0.93  | 0.67  | 0 |
| 676 | gi 5453990   | PSME1  | proteasome activator complex subunit 1 isoform 1             | 1.07 | 0.79  | 0.81  | 0 |
| 677 | gi 30410796  | PSME3  | proteasome activator complex subunit 3 isoform 2             | 1.00 | 1.05  | 4.53* | 0 |
| 678 | gi 46249388  | PSPH   | phosphoserine phosphatase                                    | 1.26 | 1.08  | 0.66  | 0 |
| 679 | gi 23308579  | PTGES3 | prostaglandin E synthase 3 isoform a                         | 0.79 | 0.86  | 0.2*  | 0 |
| 680 | gi 42734430  | PTRF   | polymerase I and transcript release factor                   | 1.09 | 0.76  | 0.59  | 0 |
| 681 | gi 5902034   | PWP1   | periodic tryptophan protein 1 homolog                        | 0.71 | 1.08  | 1.51  | 0 |
| 682 | gi 24797097  | PYCR1  | pyrroline-5-carboxylate reductase 1, mitochondrial isoform 1 | 0.99 | 2.56  | 1.03  | 0 |
| 683 | gi 4826960   | QARS   | glutamine--tRNA ligase isoform a                             | 0.91 | 0.56* | 0.93  | 0 |
| 684 | gi 13654276  | QTRT1  | queuine tRNA-ribosyltransferase                              | 0.79 | 0.99  | 0.51  | 0 |
| 685 | gi 256222019 | RAB10  | ras-related protein Rab-10                                   | 1.52 | 0.97  | 0.97  | 0 |
| 686 | gi 4758988   | RAB1A  | ras-related protein Rab-1A isoform 1                         | 0.92 | 1.07  | 1.02  | 0 |
| 687 | gi 13569962  | RAB1B  | ras-related protein Rab-1B                                   | 1.23 | 1.83  | 0.67  | 0 |
| 688 | gi 19923262  | RAB5A  | ras-related protein Rab-5A isoform 1                         | 1.12 | 1.47  | 1.61  | 0 |
| 689 | gi 4506371   | RAB5B  | ras-related protein Rab-5B isoform 1                         | 1.06 | 0.79  | 0.78  | 0 |
| 690 | gi 34147513  | RAB7A  | ras-related protein Rab-7a                                   | 0.94 | 0.84  | 0.89  | 0 |
| 691 | gi 16933567  | RAB8A  | ras-related protein Rab-8A                                   | 0.84 | 0.73  | 0.37* | 0 |
| 692 | gi 31377798  | RABEP1 | rab GTPase-binding effector protein 1 isoform 1              | 1.35 | 0.86  | 2.47  | 0 |

|     |              |         |                                                      |       |       |       |   |
|-----|--------------|---------|------------------------------------------------------|-------|-------|-------|---|
| 693 | gi 4506387   | RAD23B  | UV excision repair protein RAD23 homolog B isoform 1 | 0.32  | 1.23  | 0.97  | 0 |
| 694 | gi 19924129  | RAD50   | DNA repair protein RAD50                             | 0.88  | 1.23  | 0.79  | 0 |
| 695 | gi 5453555   | RAN     | GTP-binding nuclear protein Ran isoform 1            | 0.93* | 0.49  | 0.26  | 0 |
| 696 | gi 4506407   | RANBP1  | ran-specific GTPase-activating protein isoform 2     | 0.79  | 0.79  | 0.31  | 0 |
| 697 | gi 150418007 | RANBP2  | E3 SUMO-protein ligase RanBP2                        | 0.86  | 0.89  | 0.85* | 1 |
| 698 | gi 4506411   | RANGAP1 | ran GTPase-activating protein 1                      | 1.12  | 1.54  | 0.52  | 1 |
| 699 | gi 15149476  | RARS    | arginine--tRNA ligase, cytoplasmic                   | 0.99  | 0.53  | 1.58  | 0 |
| 700 | gi 5032027   | RBBP4   | histone-binding protein RBBP4 isoform a              | 1.38  | 1.36  | 1.49  | 0 |
| 701 | gi 19923345  | RBM12   | RNA-binding protein 12                               | 0.89  | 1.03  | 0.94  | 6 |
| 702 | gi 5454064   | RBM14   | RNA-binding protein 14 isoform 1                     | 1.23  | 0.65* | 0.57  | 1 |
| 703 | gi 55741709  | RBM25   | RNA-binding protein 25                               | 0.77  | 0.67  | 1.07  | 2 |
| 704 | gi 31652264  | RBM26   | RNA-binding protein 26 isoform 3                     | 0.70  | 0.51  | 0.37  | 7 |
| 705 | gi 4757926   | RBM39   | RNA-binding protein 39 isoform b                     | 1.54  | 0.61  | 0.48  | 0 |
| 706 | gi 4826972   | RBM8A   | RNA-binding protein 8A                               | 0.88  | 1.04  | 0.78  | 0 |
| 707 | gi 29789090  | RCC2    | protein RCC2                                         | 1.27  | 0.77  | 0.39* | 0 |
| 708 | gi 4506455   | RCN1    | reticulocalbin-1 precursor                           | 2.17* | 1.58  | 1.68  | 0 |
| 709 | gi 28626510  | RCN3    | reticulocalbin-3 precursor                           | 1.16  | 1.45* | 1.89  | 0 |
| 710 | gi 4506491   | RFC4    | replication factor C subunit 4                       | 1.14  | 1.24  | 0.58  | 0 |
| 711 | gi 5032041   | RHEB    | GTP-binding protein Rheb                             | 1.24  | 0.58  | 0.66  | 0 |
| 712 | gi 10835049  | RHOA    | transforming protein RhoA precursor                  | 0.79  | 1.30  | 0.78  | 0 |

|     |              |        |                                      |       |       |       |   |
|-----|--------------|--------|--------------------------------------|-------|-------|-------|---|
| 713 | gi 21361547  | RNH1   | ribonuclease inhibitor               | 1.11  | 1.20  | 0.27  | 0 |
| 714 | gi 40316915  | RNPEP  | aminopeptidase B                     | 1.15  | 0.89  | 0.42* | 0 |
| 715 | gi 41872583  | ROCK2  | rho-associated protein kinase 2      | 0.71  | 0.91  | 0.68  | 2 |
| 716 | gi 223890243 | RPL10  | 60S ribosomal protein L10 isoform a  | 0.96  | 1.46* | 0.4*  | 0 |
| 717 | gi 15431288  | RPL10A | 60S ribosomal protein L10a           | 1.88  | 2.21  | 0.87  | 0 |
| 718 | gi 4506597   | RPL12  | 60S ribosomal protein L12            | 1.30  | 1.08  | 0.71  | 0 |
| 719 | gi 6912634   | RPL13A | 60S ribosomal protein L13a isoform 1 | 0.99  | 1.01  | 0.29* | 1 |
| 720 | gi 78000181  | RPL14  | 60S ribosomal protein L14            | 1.60  | 1.38  | 0.28* | 0 |
| 721 | gi 4506617   | RPL17  | 60S ribosomal protein L17 isoform a  | 1.60  | 1.18  | 0.43  | 0 |
| 722 | gi 4506607   | RPL18  | 60S ribosomal protein L18 isoform 1  | 0.89* | 1.16  | 0.39  | 0 |
| 723 | gi 4506609   | RPL19  | 60S ribosomal protein L19            | 1.07  | 1.21* | 0.17* | 0 |
| 724 | gi 4506613   | RPL22  | 60S ribosomal protein L22 proprotein | 0.87  | 1.19  | 0.48  | 0 |
| 725 | gi 4506605   | RPL23  | 60S ribosomal protein L23            | 0.78  | 0.79  | 0.44  | 0 |
| 726 | gi 17105394  | RPL23A | 60S ribosomal protein L23a           | 1.21  | 1.26  | 0.61* | 0 |
| 727 | gi 4506619   | RPL24  | 60S ribosomal protein L24            | 1.31* | 1.72  | 0.25* | 0 |
| 728 | gi 4506625   | RPL27A | 60S ribosomal protein L27a           | 1.01  | 1.11  | 0.56  | 0 |
| 729 | gi 16117787  | RPL34  | 60S ribosomal protein L34            | 1.35  | 1.08  | 0.35  | 0 |
| 730 | gi 6005860   | RPL35  | 60S ribosomal protein L35            | 2.06  | 1.74  | 0.19  | 0 |
| 731 | gi 16579885  | RPL4   | 60S ribosomal protein L4             | 1.19  | 1.71* | 0.27* | 0 |
| 732 | gi 16753227  | RPL6   | 60S ribosomal protein L6             | 2.08  | 1.41  | 0.26* | 0 |

|     |              |        |                                                                                    |       |       |       |   |
|-----|--------------|--------|------------------------------------------------------------------------------------|-------|-------|-------|---|
| 733 | gi 15431301  | RPL7   | 60S ribosomal protein L7                                                           | 1.46* | 1.15  | 0.29  | 0 |
| 734 | gi 4506661   | RPL7A  | 60S ribosomal protein L7a                                                          | 1.00  | 1.49  | 0.44* | 0 |
| 735 | gi 4506663   | RPL8   | 60S ribosomal protein L8                                                           | 1.33  | 1.15  | 0.29* | 0 |
| 736 | gi 15431303  | RPL9   | 60S ribosomal protein L9                                                           | 1.39  | 0.58  | 0.52  | 0 |
| 737 | gi 4506667   | RPLP0  | 60S acidic ribosomal protein P0                                                    | 1.09* | 0.87  | 2.20  | 0 |
| 738 | gi 4506669   | RPLP1  | 60S acidic ribosomal protein P1 isoform 1                                          | 1.16* | 1.79* | 2.75* | 0 |
| 739 | gi 4506671   | RPLP2  | 60S acidic ribosomal protein P2                                                    | 0.66  | 0.81  | 2.11* | 0 |
| 740 | gi 4506675   | RPN1   | dolichyl-diphosphooligosaccharide--protein glycosyltransferase subunit 1 precursor | 1.29* | 2.21* | 2.48* | 0 |
| 741 | gi 183396804 | RPRD2  | regulation of nuclear pre-mRNA domain-containing protein 2 isoform 1               | 1.36* | 0.95* | 0.74  | 7 |
| 742 | gi 4506679   | RPS10  | 40S ribosomal protein S10                                                          | 2.53  | 0.64  | 0.28  | 0 |
| 743 | gi 14277700  | RPS12  | 40S ribosomal protein S12                                                          | 0.68  | 0.79  | 0.70  | 0 |
| 744 | gi 4506685   | RPS13  | 40S ribosomal protein S13                                                          | 1.15* | 0.68  | 0.36  | 0 |
| 745 | gi 5032051   | RPS14  | 40S ribosomal protein S14                                                          | 1.72  | 1.65  | 0.91  | 0 |
| 746 | gi 4506687   | RPS15  | 40S ribosomal protein S15 isoform 2                                                | 2.30  | 0.99  | 0.48  | 0 |
| 747 | gi 14165469  | RPS15A | 40S ribosomal protein S15a                                                         | 0.93  | 1.02  | 0.41  | 0 |
| 748 | gi 4506691   | RPS16  | 40S ribosomal protein S16                                                          | 0.85  | 0.84  | 0.16* | 0 |
| 749 | gi 4506693   | RPS17  | 40S ribosomal protein S17                                                          | 1.23  | 1.01  | 0.27  | 0 |
| 750 | gi 11968182  | RPS18  | 40S ribosomal protein S18                                                          | 1.51* | 1.41  | 0.41  | 0 |
| 751 | gi 4506695   | RPS19  | 40S ribosomal protein S19                                                          | 1.23  | 0.93  | 0.52  | 0 |
| 752 | gi 15055539  | RPS2   | 40S ribosomal protein S2                                                           | 1.28  | 0.90  | 0.66  | 0 |

|     |              |         |                                                    |      |       |       |   |
|-----|--------------|---------|----------------------------------------------------|------|-------|-------|---|
| 753 | gi 4506701   | RPS23   | 40S ribosomal protein S23                          | 0.92 | 1.03  | 0.49  | 0 |
| 754 | gi 4506713   | RPS27A  | ubiquitin-40S ribosomal protein S27a precursor     | 1.26 | 1.05  | 0.47* | 0 |
| 755 | gi 4506715   | RPS28   | 40S ribosomal protein S28                          | 1.73 | 0.95  | 0.24  | 0 |
| 756 | gi 15718687  | RPS3    | 40S ribosomal protein S3 isoform 1                 | 0.56 | 0.64* | 1.01  | 0 |
| 757 | gi 4506723   | RPS3A   | 40S ribosomal protein S3a isoform 1                | 1.20 | 0.71  | 0.63* | 0 |
| 758 | gi 4506725   | RPS4X   | 40S ribosomal protein S4, X isoform X isoform      | 0.94 | 0.80  | 0.18* | 0 |
| 759 | gi 13904870  | RPS5    | 40S ribosomal protein S5                           | 0.79 | 1.32  | 0.60  | 0 |
| 760 | gi 17158044  | RPS6    | 40S ribosomal protein S6                           | 1.03 | 1.32  | 0.16* | 0 |
| 761 | gi 4506741   | RPS7    | 40S ribosomal protein S7                           | 0.79 | 0.66  | 0.58  | 0 |
| 762 | gi 4506743   | RPS8    | 40S ribosomal protein S8                           | 0.89 | 1.12  | 0.54  | 0 |
| 763 | gi 14141193  | RPS9    | 40S ribosomal protein S9                           | 1.00 | 0.89  | 0.31* | 0 |
| 764 | gi 9845502   | RPSA    | 40S ribosomal protein SA isoform 1                 | 1.00 | 1.15  | 0.37* | 0 |
| 765 | gi 110611218 | RRBP1   | ribosome-binding protein 1                         | 0.98 | 1.54* | 1.64* | 0 |
| 766 | gi 4506749   | RRM1    | ribonucleoside-diphosphate reductase large subunit | 0.95 | 0.53* | 1.34  | 0 |
| 767 | gi 7657015   | RTCB    | tRNA-splicing ligase RtcB homolog                  | 1.00 | 0.67* | 0.90  | 0 |
| 768 | gi 4506753   | RUVBL1  | ruvB-like 1                                        | 1.24 | 1.07  | 1.49* | 0 |
| 769 | gi 5730023   | RUVBL2  | ruvB-like 2                                        | 0.99 | 0.86  | 2.95* | 0 |
| 770 | gi 5032057   | S100A11 | protein S100-A11                                   | 0.66 | 0.78  | 0.85  | 0 |
| 771 | gi 5174659   | S100A13 | protein S100-A13                                   | 0.78 | 0.95  | 0.74  | 0 |
| 772 | gi 4885585   | SAE1    | SUMO-activating enzyme subunit 1 isoform a         | 1.99 | 0.72  | 0.47  | 0 |

|     |              |          |                                                           |       |       |       |    |
|-----|--------------|----------|-----------------------------------------------------------|-------|-------|-------|----|
| 773 | gi 7661936   | SAFB2    | scaffold attachment factor B2                             | 1.23  | 0.95  | 0.73  | 2  |
| 774 | gi 9910542   | SAR1A    | GTP-binding protein SAR1a                                 | 0.70  | 1.01  | 1.36  | 0  |
| 775 | gi 32129199  | SARNP    | SAP domain-containing ribonucleoprotein                   | 0.77  | 0.76  | 0.3*  | 0  |
| 776 | gi 16306548  | SARS     | serine--tRNA ligase, cytoplasmic                          | 0.84  | 1.09  | 0.68  | 0  |
| 777 | gi 16445419  | SCAMP3   | secretory carrier-associated membrane protein 3 isoform 1 | 0.97  | 1.04  | 1.20  | 2  |
| 778 | gi 449083351 | SEC16A   | protein transport protein Sec16A isoform 2                | 0.94  | 1.02  | 0.38  | 5  |
| 779 | gi 380837121 | SEC22B   | vesicle-trafficking protein SEC22b precursor              | 0.81  | 0.93  | 1.11  | 0  |
| 780 | gi 38373669  | SEC24C   | protein transport protein Sec24C                          | 0.74  | 0.39* | 1.00  | 1  |
| 781 | gi 385137130 | SELENBP1 | selenium-binding protein 1 isoform 3                      | 0.56  | 1.11  | 0.90  | 0  |
| 782 | gi 4758158   | SEPT2    | septin-2 isoform a                                        | 1.05  | 1.01  | 0.70  | 0  |
| 783 | gi 148352331 | SEPT7    | septin-7 isoform 1                                        | 1.15  | 1.12  | 0.68  | 0  |
| 784 | gi 13489087  | SERPINB1 | leukocyte elastase inhibitor                              | 0.75  | 1.08  | 0.76  | 0  |
| 785 | gi 167860126 | SERPINB5 | serpin B5                                                 | 0.73  | 0.72  | 0.79  | 0  |
| 786 | gi 32454741  | SERPINH1 | serpin H1 precursor                                       | 1.01  | 1.42* | 2.25* | 0  |
| 787 | gi 5032087   | SF3A1    | splicing factor 3A subunit 1                              | 0.92  | 1.13  | 1.8*  | 10 |
| 788 | gi 5803167   | SF3A3    | splicing factor 3A subunit 3                              | 1.21  | 0.73  | 1.29  | 0  |
| 789 | gi 54112117  | SF3B1    | splicing factor 3B subunit 1 isoform 1                    | 1.15  | 1.04  | 1.09* | 1  |
| 790 | gi 7706326   | SF3B14   | splicing factor 3B subunit 6                              | 1.29  | 1.04  | 0.83  | 0  |
| 791 | gi 55749531  | SF3B2    | splicing factor 3B subunit 2                              | 2.65* | 1.03  | 0.36* | 11 |
| 792 | gi 54112121  | SF3B3    | splicing factor 3B subunit 3                              | 0.62  | 0.65* | 1.75* | 0  |

|     |              |          |                                                                                               |       |       |       |    |
|-----|--------------|----------|-----------------------------------------------------------------------------------------------|-------|-------|-------|----|
| 793 | gi 5454052   | SFN      | 14-3-3 protein sigma                                                                          | 1.30  | 1.27  | 1.06  | 0  |
| 794 | gi 4826998   | SFPQ     | splicing factor, proline- and glutamine-rich                                                  | 1.31* | 0.66  | 1.14  | 11 |
| 795 | gi 23618867  | SFXN1    | sideroflexin-1                                                                                | 0.65  | 0.31  | 3.18* | 0  |
| 796 | gi 13775198  | SH3BGRL3 | SH3 domain-binding glutamic acid-rich-like protein 3                                          | 0.82  | 0.75  | 2.97  | 0  |
| 797 | gi 4506929   | SH3GL1   | endophilin-A2 isoform 1                                                                       | 0.95  | 1.46  | 1.07  | 0  |
| 798 | gi 7705773   | SH3GLB1  | endophilin-B1 isoform 1                                                                       | 1.30  | 0.79  | 0.33  | 0  |
| 799 | gi 63055059  | SH3PXD2B | SH3 and PX domain-containing protein 2B isoform a                                             | 1.21  | 0.99  | 0.74  | 2  |
| 800 | gi 22547189  | SHMT1    | serine hydroxymethyltransferase, cytosolic isoform 2                                          | 0.50  | 0.53  | 0.29* | 0  |
| 801 | gi 23397666  | SIN3A    | paired amphipathic helix protein Sin3a                                                        | 1.13  | 0.89  | 0.99  | 2  |
| 802 | gi 25777713  | SKP1     | S-phase kinase-associated protein 1 isoform b                                                 | 0.83  | 0.65  | 1.18  | 1  |
| 803 | gi 5032093   | SLC1A5   | neutral amino acid transporter B(0) isoform 1                                                 | 1.43  | 0.41  | 1.71  | 0  |
| 804 | gi 156071459 | SLC25A5  | ADP/ATP translocase 2                                                                         | 0.88* | 1.10  | 1.6*  | 0  |
| 805 | gi 5902090   | SLC2A3   | solute carrier family 2, facilitated glucose transporter member 3                             | 1.08  | 0.95  | 1.15  | 0  |
| 806 | gi 52352803  | SLC30A1  | zinc transporter 1                                                                            | 1.73  | 0.81  | 1.03  | 0  |
| 807 | gi 65506891  | SLC3A2   | 4F2 cell-surface antigen heavy chain isoform c                                                | 1.24  | 0.56* | 1.67* | 0  |
| 808 | gi 71979932  | SLC7A5   | large neutral amino acids transporter small subunit 1                                         | 0.92  | 0.77  | 2.28  | 0  |
| 809 | gi 4759140   | SLC9A3R1 | Na(+)/H(+) exchange regulatory cofactor NHE-RF1                                               | 1.03  | 0.86  | 0.5*  | 0  |
| 810 | gi 41281453  | SLK      | STE20-like serine/threonine-protein kinase isoform 1                                          | 1.31* | 0.51* | 0.75  | 0  |
| 811 | gi 188536047 | SMARCC1  | SWI/SNF complex subunit SMARCC1                                                               | 1.07  | 0.82  | 1.37  | 8  |
| 812 | gi 21264355  | SMARCE1  | SWI/SNF-related matrix-associated actin-dependent regulator of chromatin subfamily E member 1 | 0.85  | 1.19  | 1.31  | 1  |

|     |              |          |                                                             |       |      |       |   |
|-----|--------------|----------|-------------------------------------------------------------|-------|------|-------|---|
| 813 | gi 30581135  | SMC1A    | structural maintenance of chromosomes protein 1A isoform 1  | 0.91  | 0.79 | 1.24  | 0 |
| 814 | gi 110347418 | SMC2     | structural maintenance of chromosomes protein 2             | 0.75  | 0.78 | 0.86  | 0 |
| 815 | gi 4885399   | SMC3     | structural maintenance of chromosomes protein 3             | 1.45* | 0.36 | 1.01  | 0 |
| 816 | gi 109948304 | SMU1     | WD40 repeat-containing protein SMU1                         | 1.09  | 2.48 | 1.76  | 0 |
| 817 | gi 209693439 | SNCG     | gamma-synuclein                                             | 0.70  | 1.17 | 0.2*  | 0 |
| 818 | gi 77404397  | SND1     | staphylococcal nuclease domain-containing protein 1         | 0.94  | 0.68 | 0.36* | 1 |
| 819 | gi 40217847  | SNRNP200 | U5 small nuclear ribonucleoprotein 200 kDa helicase         | 0.78  | 0.80 | 1.22* | 1 |
| 820 | gi 4759156   | SNRPA    | U1 small nuclear ribonucleoprotein A                        | 0.74  | 1.21 | 0.77* | 2 |
| 821 | gi 50593002  | SNRPA1   | U2 small nuclear ribonucleoprotein A'                       | 0.92  | 0.78 | 0.39* | 0 |
| 822 | gi 4507123   | SNRPB2   | U2 small nuclear ribonucleoprotein B''                      | 0.90  | 0.91 | 0.78  | 0 |
| 823 | gi 5902102   | SNRPD1   | small nuclear ribonucleoprotein Sm D1 isoform 1             | 0.75  | 1.21 | 0.36  | 0 |
| 824 | gi 4759158   | SNRPD2   | small nuclear ribonucleoprotein Sm D2 isoform 1             | 0.47* | 0.87 | 0.53  | 0 |
| 825 | gi 4759160   | SNRPD3   | small nuclear ribonucleoprotein Sm D3                       | 0.89  | 0.94 | 0.21  | 0 |
| 826 | gi 4507133   | SNRPG    | small nuclear ribonucleoprotein G                           | 2.41  | 1.04 | 0.41  | 0 |
| 827 | gi 6912676   | SNW1     | SNW domain-containing protein 1                             | 1.03  | 0.97 | 1.03  | 1 |
| 828 | gi 23111038  | SNX2     | sorting nexin-2 isoform 1                                   | 0.70  | 0.56 | 0.52  | 1 |
| 829 | gi 156627571 | SORD     | sorbitol dehydrogenase                                      | 1.31  | 0.84 | 0.68  | 0 |
| 830 | gi 27436920  | SPAG9    | C-Jun-amino-terminal kinase-interacting protein 4 isoform 3 | 0.70  | 0.76 | 0.61  | 0 |
| 831 | gi 4507185   | SPR      | sepiapterin reductase                                       | 1.48  | 0.51 | 0.94  | 0 |
| 832 | gi 112382250 | SPTBN1   | spectrin beta chain, non-erythrocytic 1 isoform 1           | 1.04  | 0.82 | 0.66  | 0 |

|     |              |        |                                                                 |       |      |       |   |
|-----|--------------|--------|-----------------------------------------------------------------|-------|------|-------|---|
| 833 | gi 5902122   | SPTBN2 | spectrin beta chain, non-erythrocytic 2                         | 0.89  | 0.7* | 0.43  | 1 |
| 834 | gi 116089325 | SREK1  | splicing regulatory glutamine/lysine-rich protein 1 isoform a   | 0.90  | 1.07 | 1.06  | 0 |
| 835 | gi 149999611 | SRP14  | signal recognition particle 14 kDa protein isoform 1            | 1.69  | 1.14 | 0.21* | 0 |
| 836 | gi 4507215   | SRP54  | signal recognition particle 54 kDa protein isoform 1            | 1.00  | 1.02 | 0.87  | 0 |
| 837 | gi 109638749 | SRP72  | signal recognition particle subunit SRP72 isoform 1             | 0.55  | 0.88 | 1.15* | 0 |
| 838 | gi 118572613 | SRRM2  | serine/arginine repetitive matrix protein 2                     | 1.23* | 0.89 | 1.04  | 3 |
| 839 | gi 5902076   | SRSF1  | serine/arginine-rich splicing factor 1 isoform 1                | 0.55  | 0.72 | 0.85  | 0 |
| 840 | gi 4759100   | SRSF11 | serine/arginine-rich splicing factor 11 isoform 1               | 1.41  | 1.25 | 0.32  | 0 |
| 841 | gi 4506901   | SRSF3  | serine/arginine-rich splicing factor 3                          | 2.41  | 1.02 | 0.45  | 2 |
| 842 | gi 86991438  | SRSF5  | serine/arginine-rich splicing factor 5                          | 0.91  | 1.13 | 0.54  | 0 |
| 843 | gi 72534660  | SRSF7  | serine/arginine-rich splicing factor 7 isoform 1                | 0.85  | 0.97 | 0.66  | 0 |
| 844 | gi 10835067  | SSB    | lupus La protein                                                | 0.62* | 0.71 | 0.27* | 0 |
| 845 | gi 4507231   | SSBP1  | single-stranded DNA-binding protein, mitochondrial precursor    | 1.05  | 1.38 | 1.82* | 0 |
| 846 | gi 5454090   | SSR4   | translocon-associated protein subunit delta isoform 2 precursor | 0.74  | 0.93 | 2.55  | 0 |
| 847 | gi 4507241   | SSRP1  | FACT complex subunit SSRP1                                      | 0.76  | 0.79 | 0.70  | 0 |
| 848 | gi 19923193  | ST13æ  | hsc70-interacting protein isoform 1                             | 0.94  | 1.00 | 0.21* | 0 |
| 849 | gi 5803181   | STIP1  | stress-induced-phosphoprotein 1 isoform b                       | 1.40  | 1.42 | 0.32* | 2 |
| 850 | gi 5031851   | STMN1  | stathmin isoform a                                              | 0.79  | 1*   | 0.34* | 0 |
| 851 | gi 7305503   | STOML2 | stomatin-like protein 2, mitochondrial isoform a                | 0.62  | 1.05 | 2.95* | 0 |
| 852 | gi 148727341 | STRAP  | serine-threonine kinase receptor-associated protein             | 1.00  | 1.04 | 0.24* | 0 |

|     |              |         |                                                             |       |       |       |   |
|-----|--------------|---------|-------------------------------------------------------------|-------|-------|-------|---|
| 853 | gi 56181387  | STUB1   | E3 ubiquitin-protein ligase CHIP isoform a                  | 0.46* | 0.68  | 0.58  | 0 |
| 854 | gi 217330646 | SUB1    | activated RNA polymerase II transcriptional coactivator p15 | 1.74  | 1.47  | 0.36* | 0 |
| 855 | gi 6005757   | SUPT16H | FACT complex subunit SPT16                                  | 0.59  | 0.65  | 0.47  | 0 |
| 856 | gi 19557702  | SURF6   | surfeit locus protein 6 isoform 1                           | 0.92  | 0.72  | 0.59  | 0 |
| 857 | gi 5803187   | TALDO1  | transaldolase                                               | 1.31  | 1.51  | 0.41  | 0 |
| 858 | gi 6678271   | TARDBP  | TAR DNA-binding protein 43                                  | 0.91  | 0.64  | 0.56  | 0 |
| 859 | gi 38202255  | TARS    | threonine--tRNA ligase, cytoplasmic isoform 1               | 0.78  | 0.86  | 0.23* | 0 |
| 860 | gi 4759212   | TBCA    | tubulin-specific chaperone A isoform 2                      | 1.25  | 1.24  | 0.28* | 0 |
| 861 | gi 5032161   | TCEB1   | transcription elongation factor B polypeptide 1 isoform a   | 1.05  | 0.64  | 0.58  | 0 |
| 862 | gi 6005890   | TCEB2   | transcription elongation factor B polypeptide 2 isoform a   | 0.69  | 2.15* | 0.29* | 0 |
| 863 | gi 91208418  | TCERG1  | transcription elongation regulator 1 isoform 2              | 0.85  | 1.10  | 0.45* | 9 |
| 864 | gi 207113160 | TCOF1   | treacle protein isoform d                                   | 1.24  | 1.17  | 0.75  | 0 |
| 865 | gi 57863257  | TCP1    | T-complex protein 1 subunit alpha isoform a                 | 0.96  | 0.88  | 1.16  | 0 |
| 866 | gi 7661666   | TES     | testin isoform 1                                            | 0.71  | 0.32  | 0.51  | 0 |
| 867 | gi 4507401   | TFAM    | transcription factor A, mitochondrial isoform 1 precursor   | 0.96  | 1.55  | 1.88* | 0 |
| 868 | gi 306774089 | TFG     | protein TFG isoform 2                                       | 0.90  | 0.85  | 0.69  | 1 |
| 869 | gi 189458817 | TFRC    | transferrin receptor protein 1                              | 0.82  | 0.55  | 1.81* | 0 |
| 870 | gi 4507491   | THOP1   | thimet oligopeptidase                                       | 0.60  | 1.00  | 0.3*  | 0 |
| 871 | gi 167234419 | THRAP3  | thyroid hormone receptor-associated protein 3               | 0.90  | 0.84  | 0.42* | 1 |
| 872 | gi 9966849   | TIGAR   | fructose-2,6-bisphosphatase TIGAR                           | 1.19  | 1.01  | 0.35  | 0 |

|     |              |          |                                                                          |       |       |       |   |
|-----|--------------|----------|--------------------------------------------------------------------------|-------|-------|-------|---|
| 873 | gi 4758152   | TIMM8A   | mitochondrial import inner membrane translocase subunit Tim8 A isoform 1 | 1.05  | 1.01  | 1.13  | 0 |
| 874 | gi 4507521   | TKT      | transketolase isoform 1                                                  | 1.02  | 0.86* | 0.25* | 0 |
| 875 | gi 223029410 | TLN1     | talin-1                                                                  | 1.18* | 1.82* | 1.34  | 0 |
| 876 | gi 98986464  | TMED10   | transmembrane emp24 domain-containing protein 10 precursor               | 1.52* | 1.03  | 2.17* | 0 |
| 877 | gi 7657649   | TMOD3    | tropomodulin-3                                                           | 1.04  | 1.92  | 2.07* | 0 |
| 878 | gi 4507555   | TMPO-a   | thymopoietin isoform alpha                                               | 0.86  | 1.10  | 1.21  | 0 |
| 879 | gi 73760405  | TMPO-b   | thymopoietin isoform beta                                                | 0.56  | 0.69  | 0.89  | 0 |
| 880 | gi 10863895  | TMSB10   | thymosin beta-10                                                         | 1.94  | 1.34  | 0.19  | 0 |
| 881 | gi 11056061  | TMSB4X   | thymosin beta-4                                                          | 3.27  | 3.16* | 0.31* | 0 |
| 882 | gi 110556636 | TNKS1BP1 | 182 kDa tankyrase-1-binding protein                                      | 1.24  | 1.11  | 0.61  | 5 |
| 883 | gi 23510381  | TNPO1    | transportin-1 isoform 2                                                  | 0.50  | 0.52  | 1.16  | 0 |
| 884 | gi 21361356  | TOMM34   | mitochondrial import receptor subunit TOM34                              | 1.13  | 1.03  | 0.67  | 0 |
| 885 | gi 54607135  | TOMM70A  | mitochondrial import receptor subunit TOM70                              | 0.82  | 1.43  | 1.86* | 0 |
| 886 | gi 389886539 | TOR1AIP1 | torsin-1A-interacting protein 1 isoform 1                                | 1.36  | 0.78  | 0.81  | 0 |
| 887 | gi 5032189   | TP53BP1  | tumor suppressor p53-binding protein 1 isoform 3                         | 2.54* | 1.69* | 1.47  | 1 |
| 888 | gi 70608174  | TPD52    | tumor protein D52 isoform 2                                              | 1.00  | 0.75  | 0.39  | 0 |
| 889 | gi 226529917 | TPI1     | triosephosphate isomerase isoform 2                                      | 1.02  | 1.40  | 0.15* | 0 |
| 890 | gi 63252900  | TPM1     | tropomyosin alpha-1 chain isoform Tpm1.7cy                               | 1.17  | 1.38  | 0.98  | 0 |
| 891 | gi 4507651   | TPM4     | tropomyosin alpha-4 chain isoform Tpm4.2cy                               | 0.93  | 2.52* | 0.69  | 0 |
| 892 | gi 186972143 | TPP2     | tripeptidyl-peptidase 2                                                  | 1.46  | 1.37  | 0.70  | 1 |

|     |              |         |                                                                         |      |       |       |   |
|-----|--------------|---------|-------------------------------------------------------------------------|------|-------|-------|---|
| 893 | gi 114155142 | TPR     | nucleoprotein TPR                                                       | 0.83 | 1.67* | 1.59* | 0 |
| 894 | gi 4759098   | TRA2B   | transformer-2 protein homolog beta isoform 1                            | 0.84 | 0.87  | 0.71  | 0 |
| 895 | gi 68160937  | TRIM25  | E3 ubiquitin/ISG15 ligase TRIM25                                        | 1.03 | 0.47  | 0.16  | 1 |
| 896 | gi 5032179   | TRIM28  | transcription intermediary factor 1-beta                                | 0.95 | 0.76* | 0.15* | 1 |
| 897 | gi 54792146  | TRIM47  | tripartite motif-containing protein 47                                  | 1.21 | 0.82  | 0.48  | 0 |
| 898 | gi 11342676  | TRIP10  | cdc42-interacting protein 4 isoform 2                                   | 0.55 | 1.05  | 0.48  | 0 |
| 899 | gi 7705477   | TRMT112 | multifunctional methyltransferase subunit TRM112-like protein isoform 1 | 0.67 | 0.63* | 0.15* | 0 |
| 900 | gi 31377800  | TROVE2  | 60 kDa SS-A/Ro ribonucleoprotein isoform 2                              | 1.22 | 0.72  | 0.79  | 0 |
| 901 | gi 5174731   | TSNAX   | translin-associated protein X                                           | 1.36 | 0.88  | 0.47  | 0 |
| 902 | gi 17402865  | TST     | thiosulfate sulfurtransferase                                           | 1.63 | 0.91  | 0.50  | 0 |
| 903 | gi 11056036  | TTL12   | tubulin--tyrosine ligase-like protein 12                                | 1.72 | 0.85  | 0.44* | 1 |
| 904 | gi 14389309  | TUBA1C  | tubulin alpha-1C chain isoform c                                        | 1.08 | 0.87  | 0.57  | 0 |
| 905 | gi 17921989  | TUBA4A  | tubulin alpha-4A chain isoform 1                                        | 1.52 | 0.82  | 0.25  | 0 |
| 906 | gi 29788785  | TUBB    | tubulin beta chain isoform b                                            | 1.69 | 0.61  | 0.49  | 0 |
| 907 | gi 4507729   | TUBB2A  | tubulin beta-2A chain isoform 1                                         | 0.87 | 1.00  | 1.06  | 0 |
| 908 | gi 5174735   | TUBB4B  | tubulin beta-4B chain                                                   | 0.94 | 0.90  | 0.41  | 0 |
| 909 | gi 14210536  | TUBB6   | tubulin beta-6 chain isoform 1                                          | 1.27 | 0.83  | 0.7*  | 0 |
| 910 | gi 34147630  | TUFM    | elongation factor Tu, mitochondrial precursor                           | 1.19 | 0.61  | 0.1*  | 0 |
| 911 | gi 6005846   | TWF2    | twinfilin-2                                                             | 1.16 | 1.03  | 1.17  | 0 |
| 912 | gi 50592994  | TXN     | thioredoxin isoform 1                                                   | 0.55 | 1.13  | 0.16* | 0 |

|     |              |         |                                                             |       |       |       |   |
|-----|--------------|---------|-------------------------------------------------------------|-------|-------|-------|---|
| 913 | gi 14249348  | TXNDC17 | thioredoxin domain-containing protein 17                    | 0.83  | 1.68  | 0.24  | 0 |
| 914 | gi 42794771  | TXNDC5  | thioredoxin domain-containing protein 5 isoform 1 precursor | 1.55* | 2.42* | 2.15* | 0 |
| 915 | gi 4759274   | TXNL1   | thioredoxin-like protein 1                                  | 0.98  | 1.01  | 0.56  | 0 |
| 916 | gi 4503445   | TYMP    | thymidine phosphorylase isoform 1 proprotein                | 0.77  | 0.38  | 0.27* | 0 |
| 917 | gi 60279268  | U2AF2   | splicing factor U2AF 65 kDa subunit isoform b               | 1.24  | 0.45* | 0.16* | 1 |
| 918 | gi 23510338  | UBA1    | ubiquitin-like modifier-activating enzyme 1                 | 1.24  | 0.91  | 0.51  | 0 |
| 919 | gi 150417996 | UBA6    | ubiquitin-like modifier-activating enzyme 6                 | 0.89  | 0.82  | 0.80  | 0 |
| 920 | gi 4507791   | UBE2M   | NEDD8-conjugating enzyme Ubc12                              | 1.54  | 0.44* | 0.75  | 0 |
| 921 | gi 4507793   | UBE2N   | ubiquitin-conjugating enzyme E2 N                           | 1.16  | 1.25  | 0.16  | 0 |
| 922 | gi 16753203  | UBQLN1  | ubiquilin-1 isoform 1                                       | 0.95  | 0.85  | 1.40  | 0 |
| 923 | gi 40538799  | UBQLN4  | ubiquilin-4 isoform 1                                       | 1.26  | 0.95  | 1.15  | 0 |
| 924 | gi 82659109  | UBR4    | E3 ubiquitin-protein ligase UBR4                            | 0.83  | 0.48  | 1.62  | 4 |
| 925 | gi 15147337  | UBR5    | E3 ubiquitin-protein ligase UBR5 isoform 1                  | 0.58  | 0.68  | 0.77  | 1 |
| 926 | gi 21361517  | UBXN1   | UBX domain-containing protein 1 isoform 1                   | 0.68  | 0.96  | 0.45  | 1 |
| 927 | gi 4507813   | UGDH    | UDP-glucose 6-dehydrogenase isoform 1                       | 0.92  | 1.02* | 1.02  | 0 |
| 928 | gi 9910280   | UGGT1   | UDP-glucose:glycoprotein glucosyltransferase 1 precursor    | 0.96  | 0.76* | 2.75* | 1 |
| 929 | gi 89179321  | UNC45A  | protein unc-45 homolog A isoform 3                          | 0.90  | 1.18  | 0.56  | 0 |
| 930 | gi 18375673  | UPF1    | regulator of nonsense transcripts 1 isoform 2               | 0.99  | 1.11  | 1.07  | 1 |
| 931 | gi 5454152   | UQCRB   | cytochrome b-c1 complex subunit 7 isoform 1                 | 0.69  | 0.85  | 4.09  | 0 |
| 932 | gi 46593007  | UQCRC1  | cytochrome b-c1 complex subunit 1, mitochondrial precursor  | 1.08* | 1.05  | 1.9*  | 0 |

|     |              |         |                                                                  |       |       |       |   |
|-----|--------------|---------|------------------------------------------------------------------|-------|-------|-------|---|
| 933 | gi 50592988  | UQCRC2  | cytochrome b-c1 complex subunit 2, mitochondrial precursor       | 0.64  | 1.01  | 2.64* | 0 |
| 934 | gi 163644321 | UQCRFS1 | cytochrome b-c1 complex subunit Rieske, mitochondrial            | 1.09  | 0.71  | 3.77* | 0 |
| 935 | gi 71051616  | UROD    | uroporphyrinogen decarboxylase                                   | 2.18  | 1.06  | 0.37  | 0 |
| 936 | gi 4827050   | USP14   | ubiquitin carboxyl-terminal hydrolase 14 isoform a               | 0.81  | 0.28* | 0.30  | 0 |
| 937 | gi 150378533 | USP7    | ubiquitin carboxyl-terminal hydrolase 7 isoform 1                | 0.97  | 0.80  | 1.20  | 0 |
| 938 | gi 21361348  | UTP14A  | U3 small nucleolar RNA-associated protein 14 homolog A isoform 1 | 1.68  | 0.39  | 0.28  | 0 |
| 939 | gi 5454158   | VARS    | valine--tRNA ligase                                              | 0.78  | 0.61  | 0.37  | 5 |
| 940 | gi 18379349  | VAT1    | synaptic vesicle membrane protein VAT-1 homolog                  | 1.17  | 1.37  | 0.61  | 1 |
| 941 | gi 4507873   | VBP1    | prefoldin subunit 3 isoform 1                                    | 0.94  | 1.25  | 1.25  | 0 |
| 942 | gi 6005942   | VCP     | transitional endoplasmic reticulum ATPase                        | 1.36  | 1.49* | 0.85  | 0 |
| 943 | gi 4507879   | VDAC1   | voltage-dependent anion-selective channel protein 1              | 0.67* | 0.92  | 2.18* | 0 |
| 944 | gi 25188179  | VDAC3   | voltage-dependent anion-selective channel protein 3 isoform 1    | 0.99  | 0.71  | 1.54  | 0 |
| 945 | gi 62414289  | VIM     | vimentin                                                         | 1.63* | 1.21* | 1.15  | 0 |
| 946 | gi 7706441   | VPS29   | vacuolar protein sorting-associated protein 29 isoform 1         | 0.92  | 0.81  | 0.59  | 0 |
| 947 | gi 17999541  | VPS35   | vacuolar protein sorting-associated protein 35                   | 0.80  | 0.43  | 1.24  | 0 |
| 948 | gi 47419914  | WARS    | tryptophan--tRNA ligase, cytoplasmic isoform a                   | 2.00  | 0.80  | 0.36* | 0 |
| 949 | gi 9257257   | WDR1    | WD repeat-containing protein 1 isoform 1                         | 0.81  | 0.96  | 0.37* | 0 |
| 950 | gi 56243583  | WDR18   | WD repeat-containing protein 18                                  | 1.12  | 0.93  | 1.69  | 0 |
| 951 | gi 45238858  | WDR44   | WD repeat-containing protein 44 isoform 1                        | 0.76  | 1.35  | 0.96  | 4 |
| 952 | gi 38327642  | WDR55   | WD repeat-containing protein 55                                  | 1.11  | 1.18  | 0.76  | 0 |

|     |              |         |                                                      |      |       |       |    |
|-----|--------------|---------|------------------------------------------------------|------|-------|-------|----|
| 953 | gi 13376840  | WDR61   | WD repeat-containing protein 61 isoform a            | 1.18 | 1.17  | 1.01  | 0  |
| 954 | gi 221219004 | WDR74   | WD repeat-containing protein 74 isoform 1            | 1.03 | 0.94  | 0.82  | 0  |
| 955 | gi 13129110  | WDR77   | methylosome protein 50                               | 0.75 | 1.06  | 0.95  | 1  |
| 956 | gi 264681563 | XPNPEP1 | xaa-Pro aminopeptidase 1 isoform 1                   | 0.84 | 0.78  | 0.48* | 0  |
| 957 | gi 11559925  | XPNPEP3 | probable Xaa-Pro aminopeptidase 3 isoform 1          | 1.23 | 0.65  | 1.63  | 0  |
| 958 | gi 4507943   | XPO1    | exportin-1                                           | 1.03 | 0.74  | 0.88  | 0  |
| 959 | gi 10863945  | XRCC5   | X-ray repair cross-complementing protein 5           | 0.77 | 0.68  | 0.98  | 0  |
| 960 | gi 4503841   | XRCC6   | X-ray repair cross-complementing protein 6 isoform 1 | 0.81 | 0.94  | 0.80  | 1  |
| 961 | gi 18860916  | XRN2    | 5'-3' exoribonuclease 2                              | 0.98 | 0.74  | 1.12  | 3  |
| 962 | gi 4507947   | YARS    | tyrosine--tRNA ligase, cytoplasmic                   | 1.06 | 0.68  | 0.41  | 0  |
| 963 | gi 34098946  | YBX1    | nuclease-sensitive element-binding protein 1         | 1.10 | 1.01  | 0.63  | 0  |
| 964 | gi 4507949   | YWHAB   | 14-3-3 protein beta/alpha                            | 0.66 | 0.72  | 0.44* | 0  |
| 965 | gi 5803225   | YWHAE   | 14-3-3 protein epsilon                               | 0.97 | 0.92* | 0.37* | 0  |
| 966 | gi 21464101  | YWHAG   | 14-3-3 protein gamma                                 | 0.53 | 0.92  | 0.52  | 0  |
| 967 | gi 4507951   | YWHAH   | 14-3-3 protein eta                                   | 1.06 | 1.36  | 0.29  | 0  |
| 968 | gi 5803227   | YWHAQ   | 14-3-3 protein theta                                 | 1.95 | 1.43  | 0.62  | 0  |
| 969 | gi 4507953   | YWHAZ   | 14-3-3 protein zeta/delta                            | 0.90 | 0.80  | 0.22* | 0  |
| 970 | gi 126723060 | ZC3H4   | zinc finger CCCH domain-containing protein 4         | 0.68 | 1.44  | 0.93  | 11 |
| 971 | gi 27477136  | ZC3HAV1 | zinc finger CCCH-type antiviral protein 1 isoform 1  | 1.13 | 1.03  | 0.88  | 1  |
| 972 | gi 4508047   | ZYX     | zyxin                                                | 1.72 | 2.1*  | 0.65  | 9  |
